# Supplementary material for: Minimally Mutated HIV-1 Broadly Neutralizing Antibodies to Guide Reductionist Vaccine Design
Source: PubMed Central journal article supplement (PMC4999182; doi:10.1371/journal.ppat.1005815), 2016-08-25
Supplement: ppat.1005815.s001.pdf [file ppat.1005815.s001.pdf]

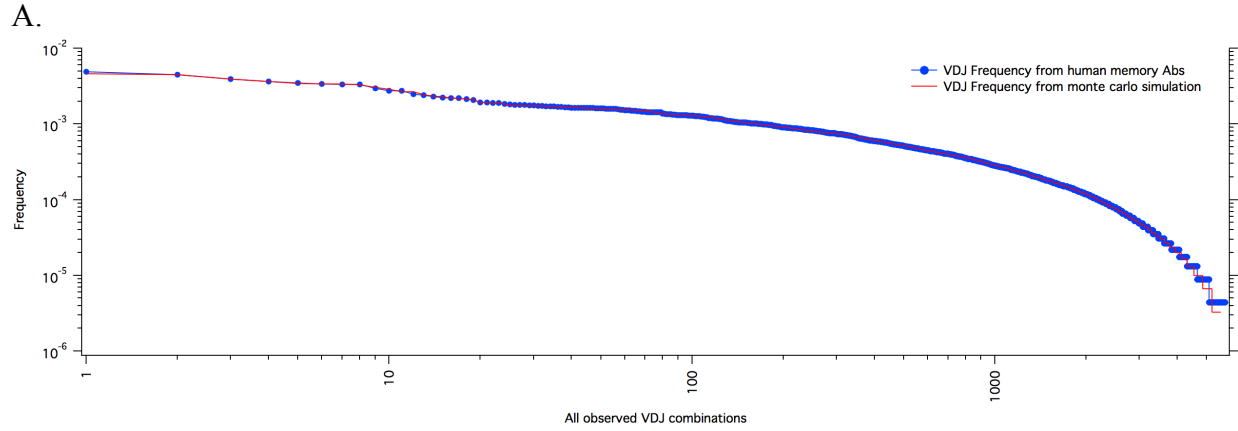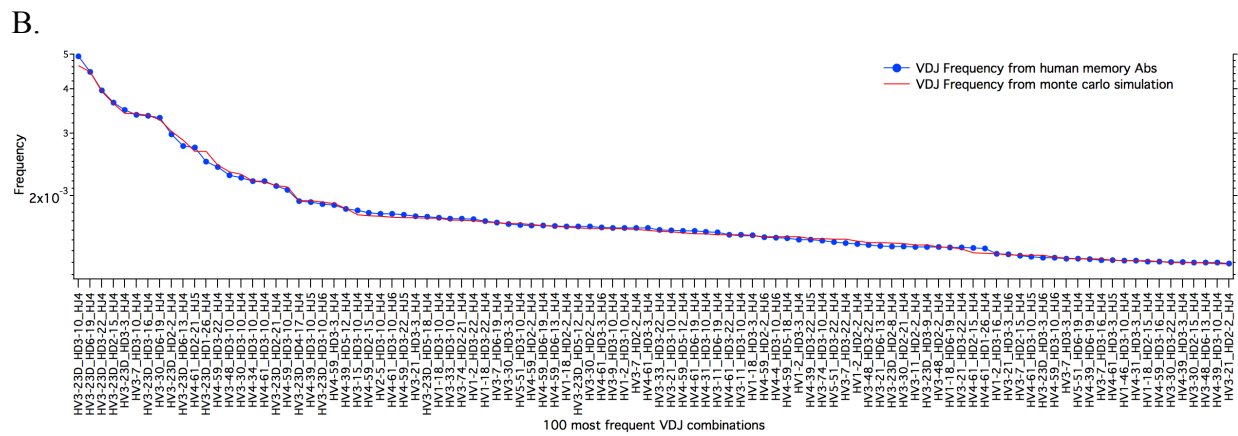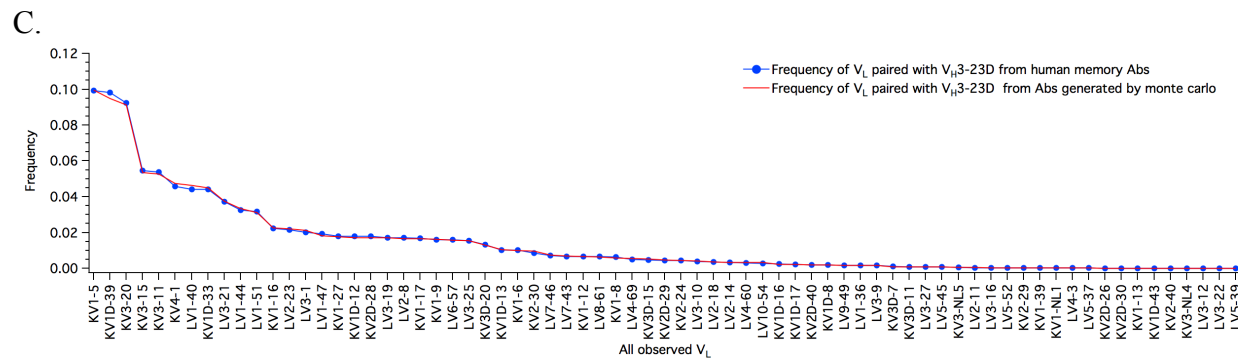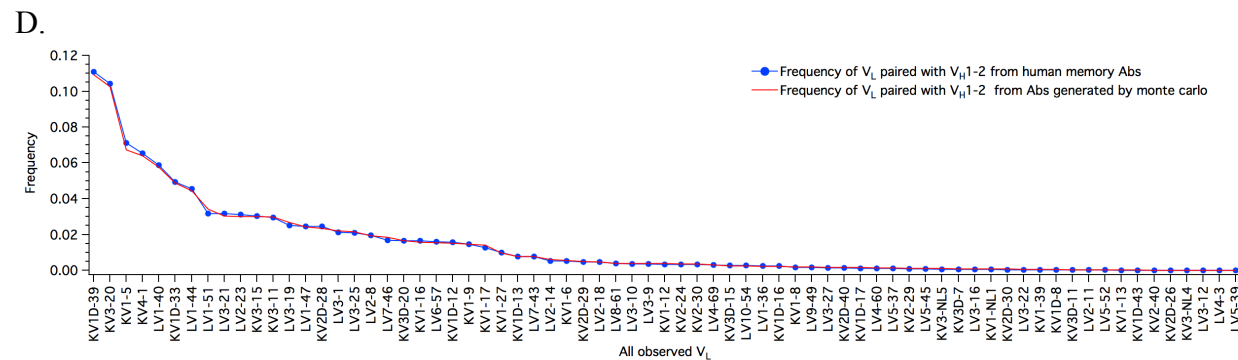

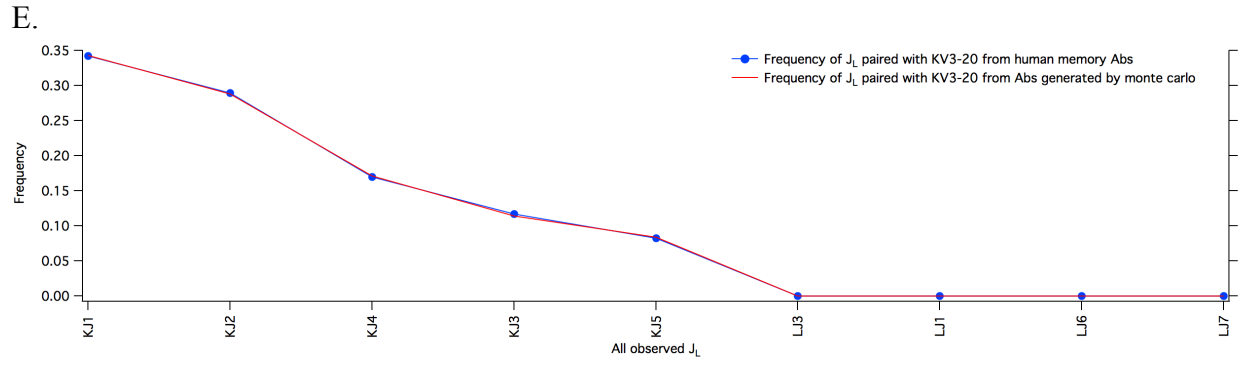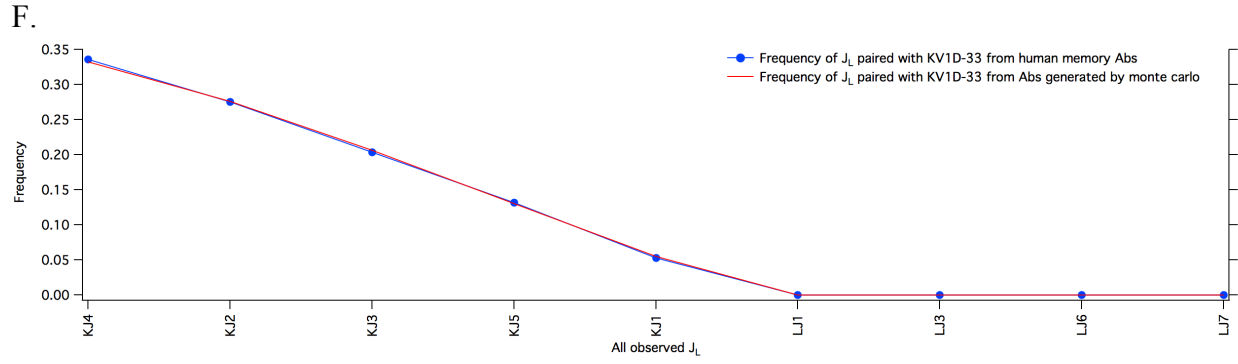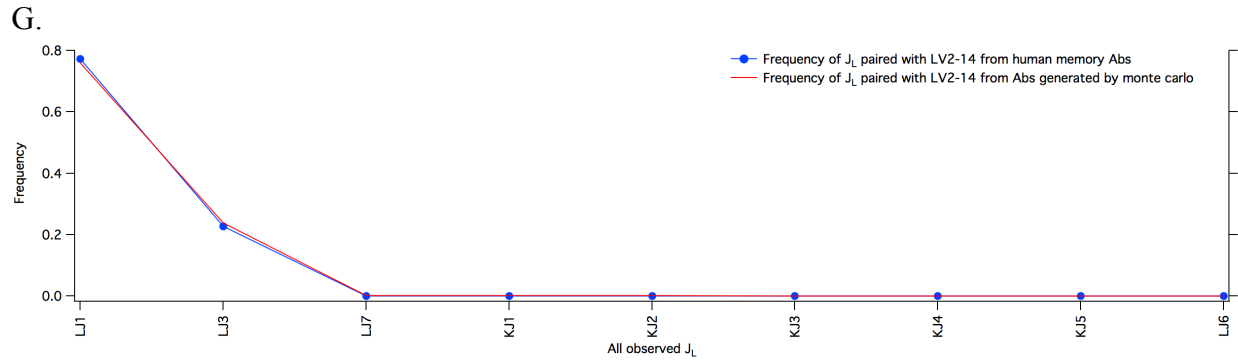

Fig. S1 (continued).

H.

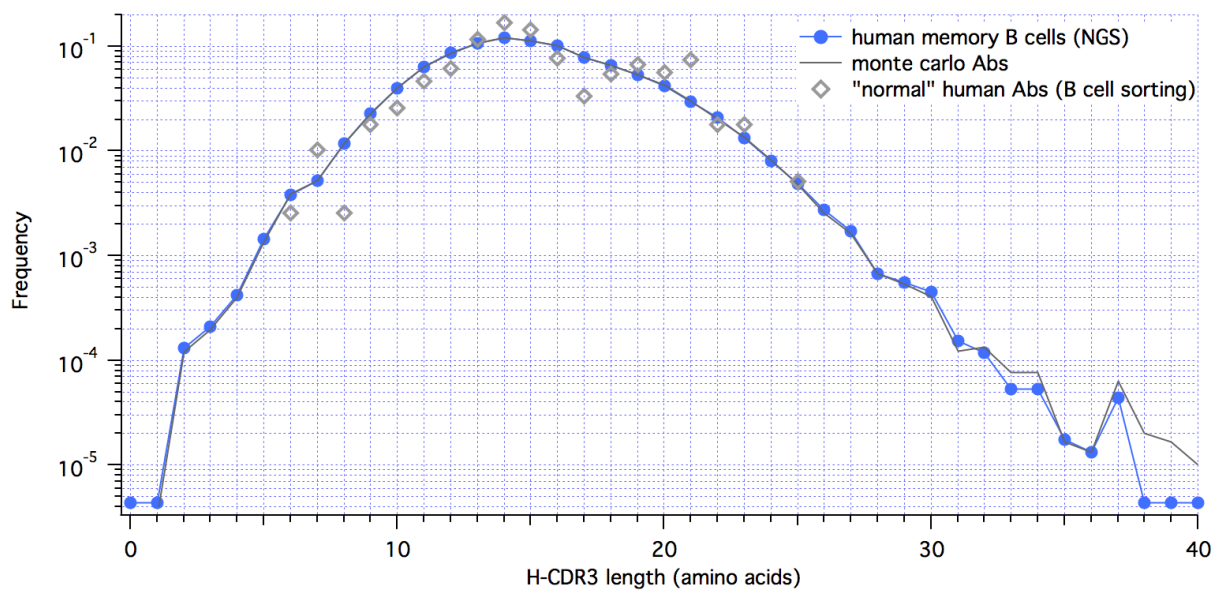

Fig. S1 (continued).

I.

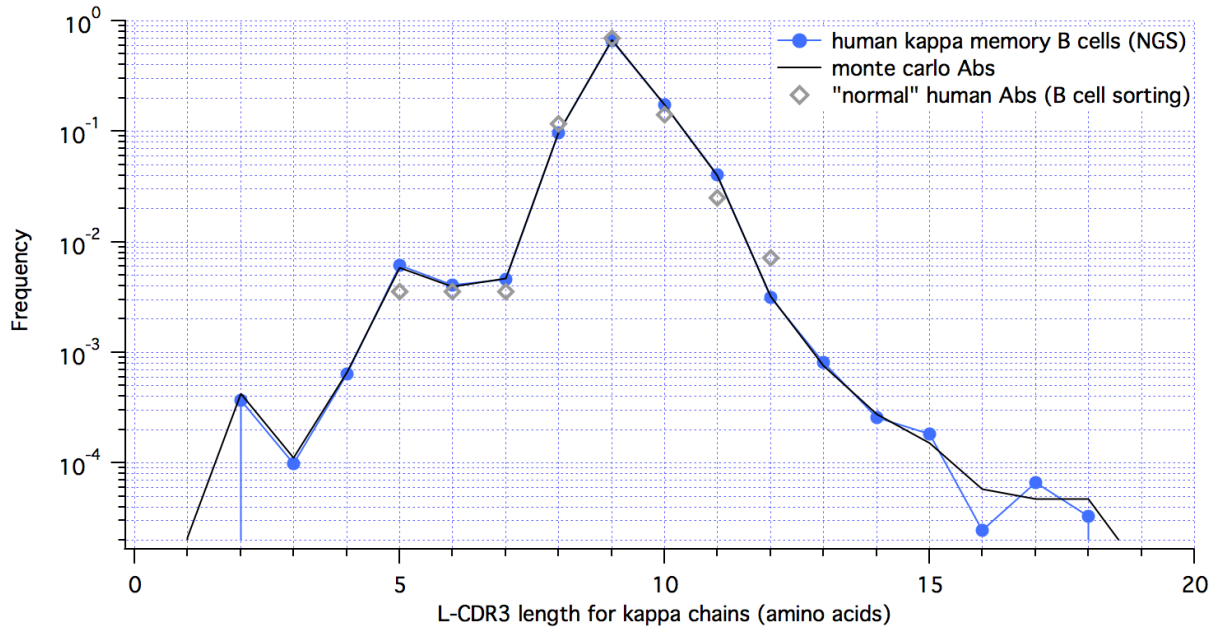

J.

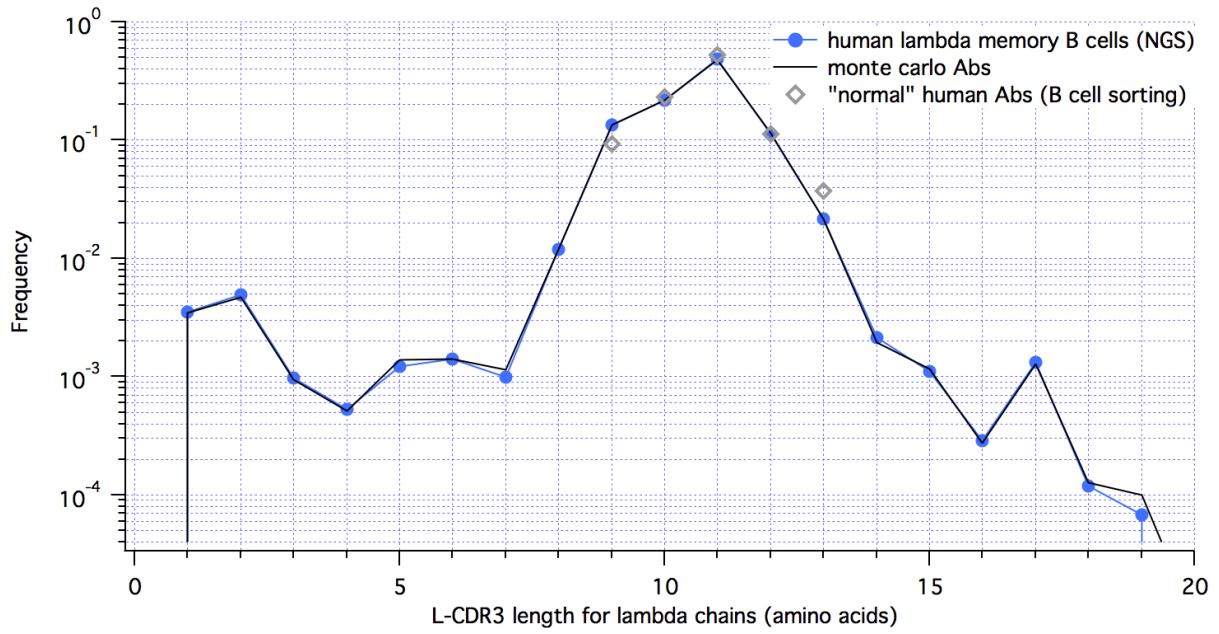

Fig. S1 (continued).

K.

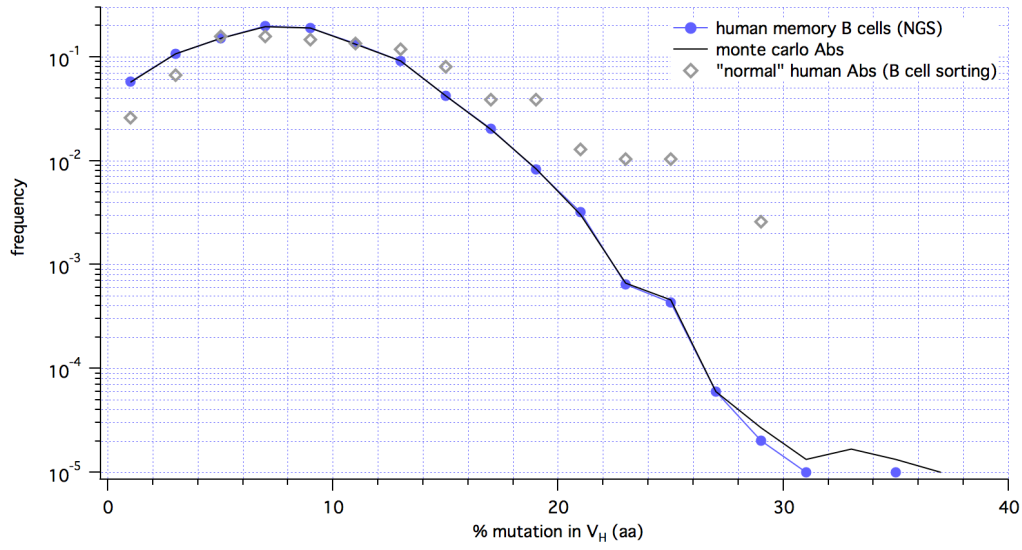

L.

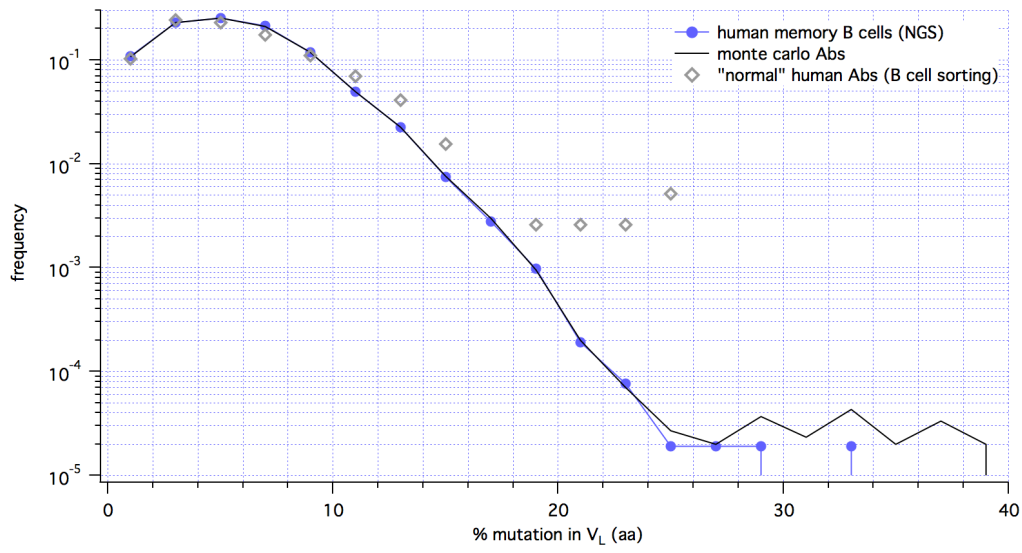

Fig. S1 (continued).

M.

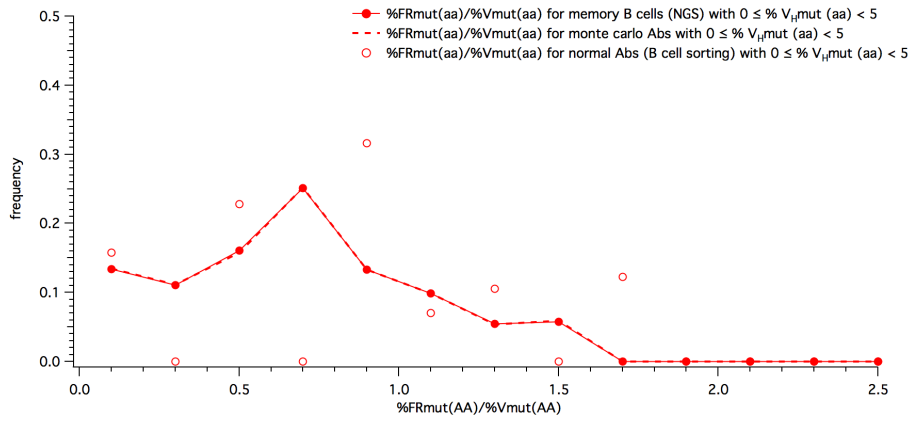

N.

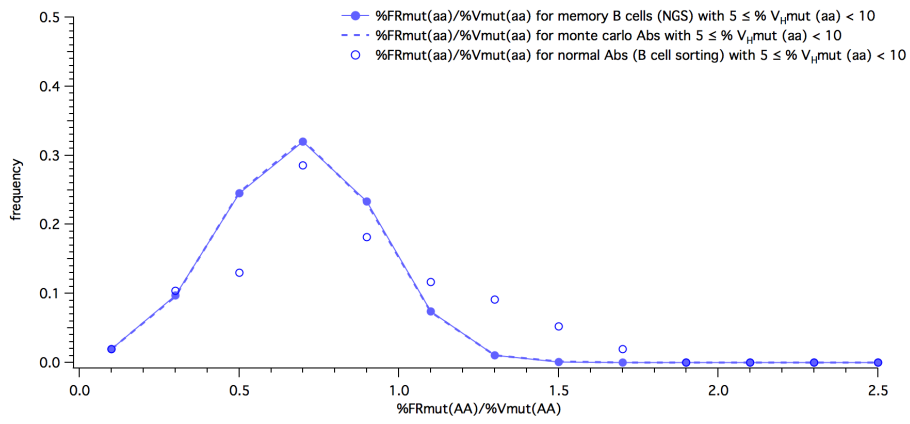

O.

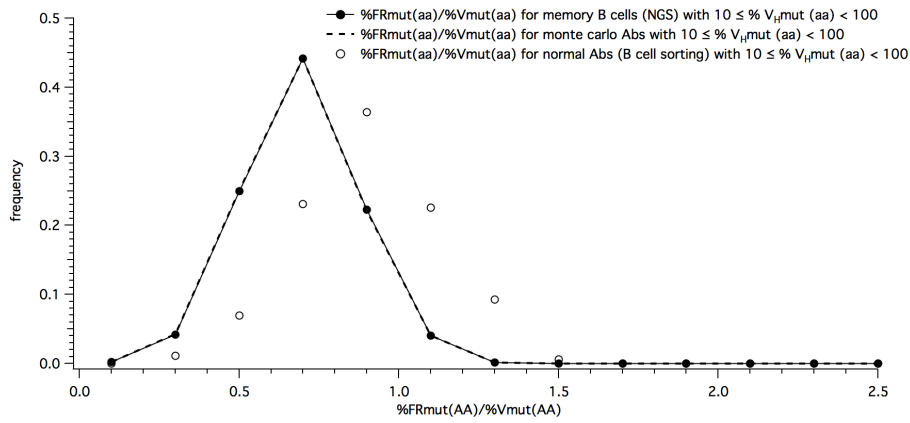

Fig. S1 (continued).

P.

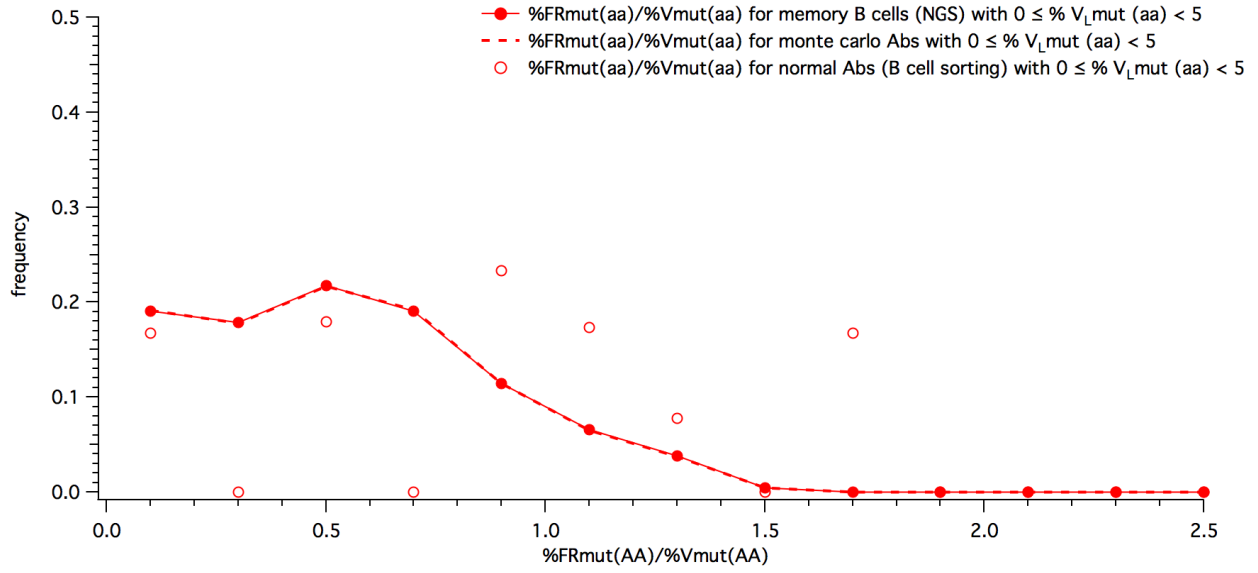

Q.

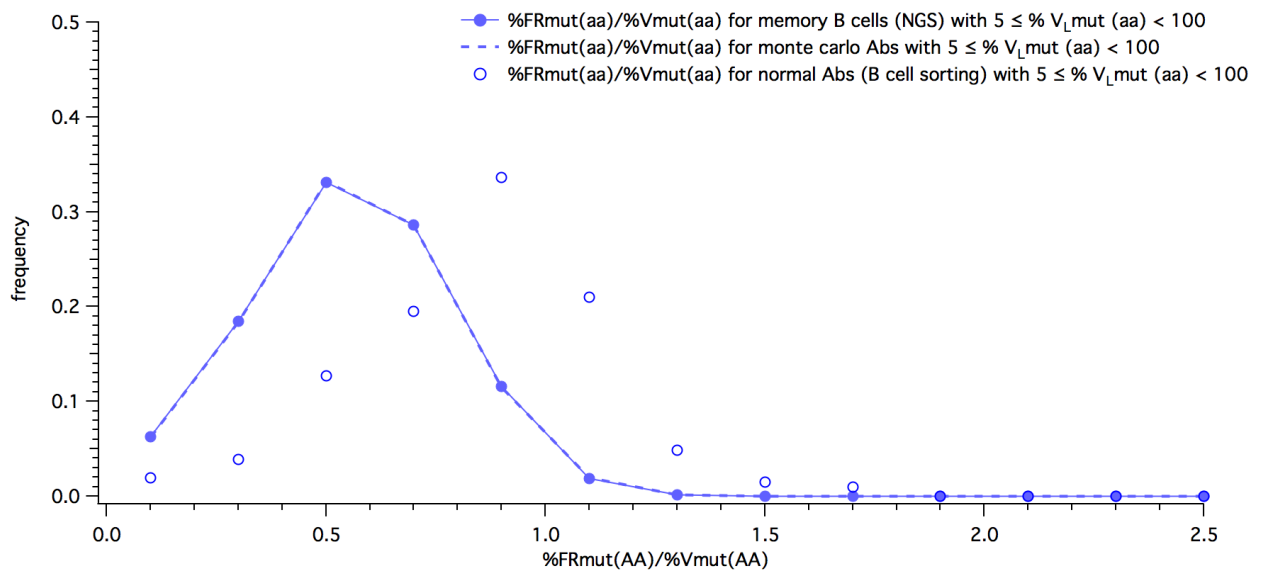

Fig. S1 (continued).

R.

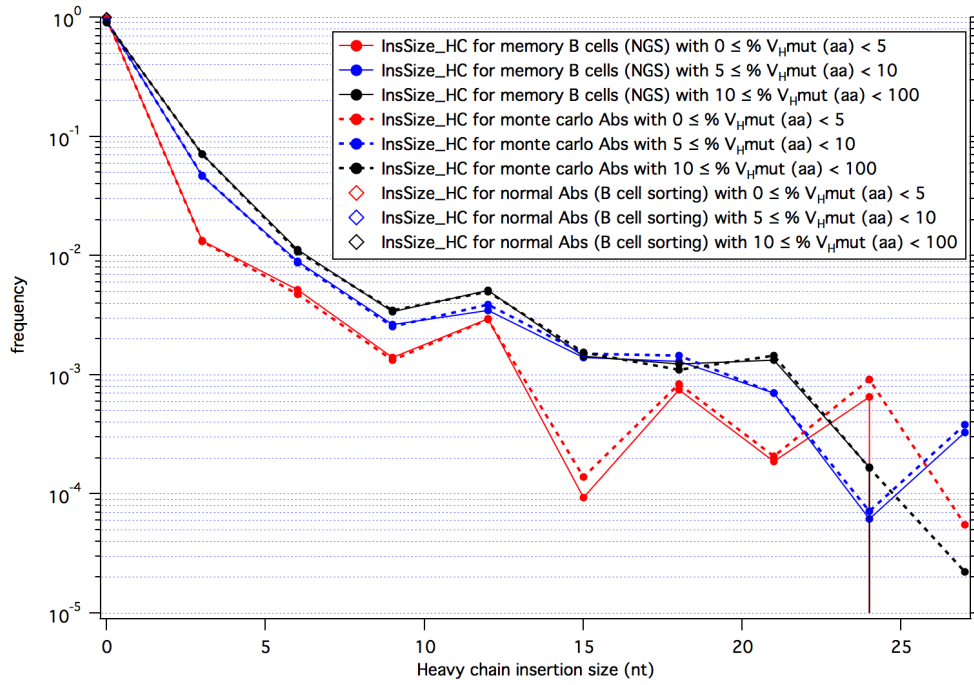

S.

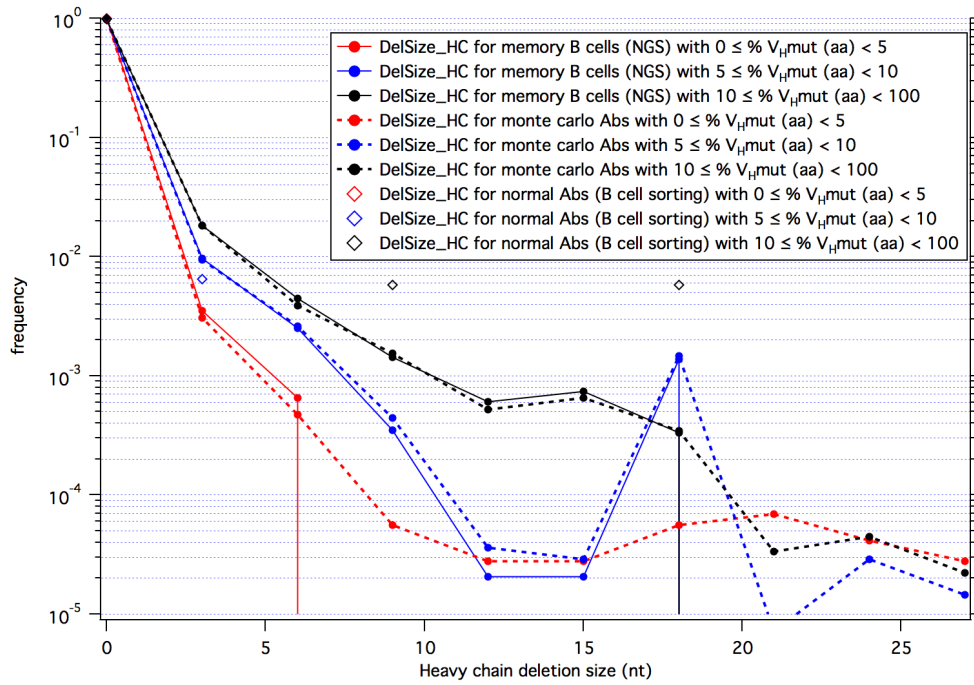

Fig. S1 (continued).



T.

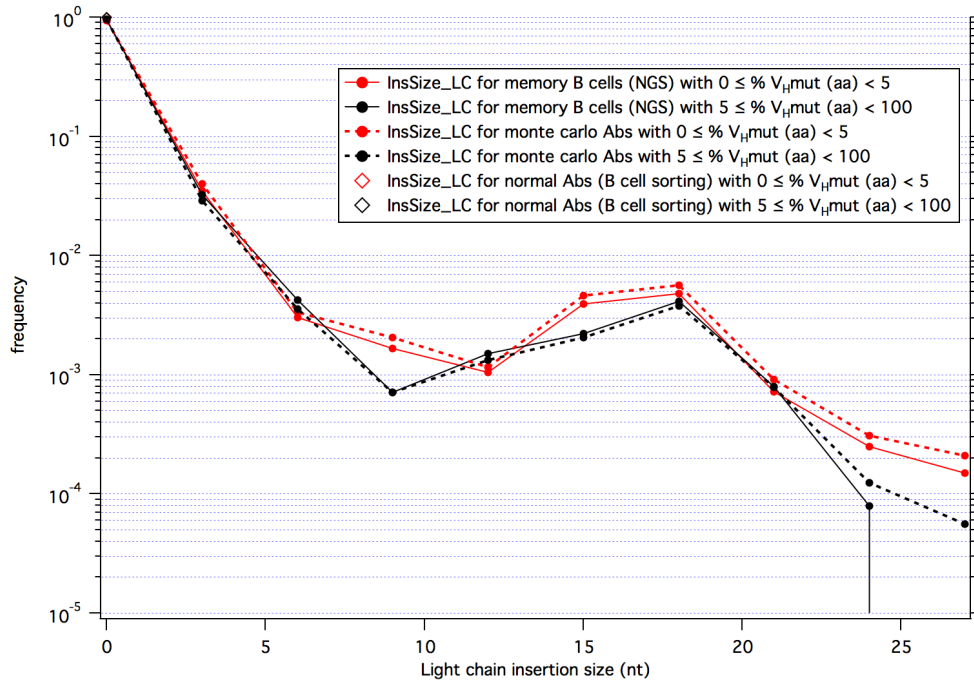

U.

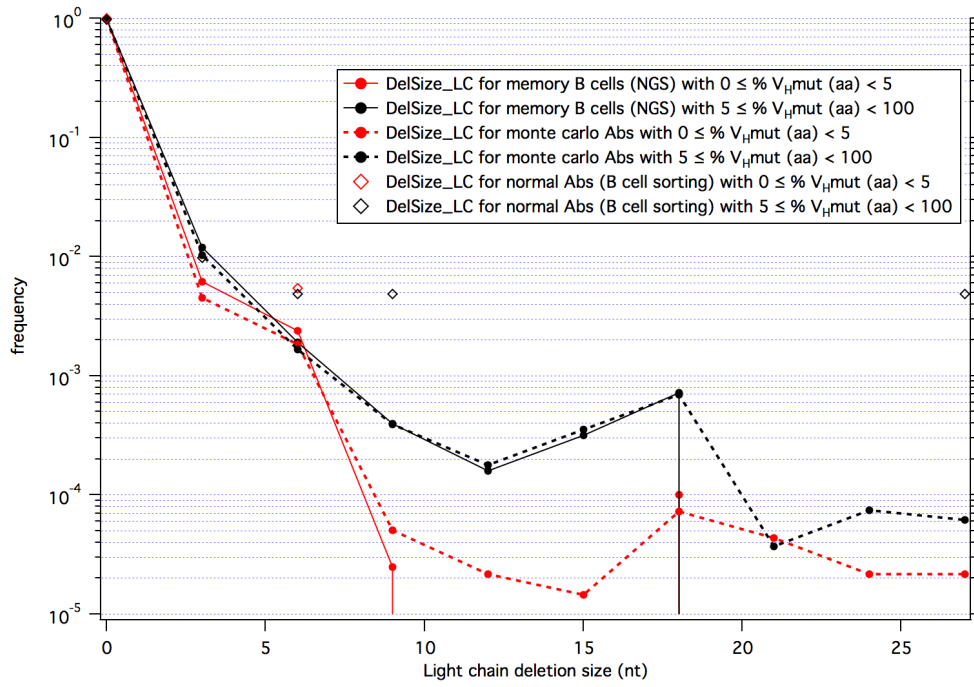

Fig. S1 (continued).

V.

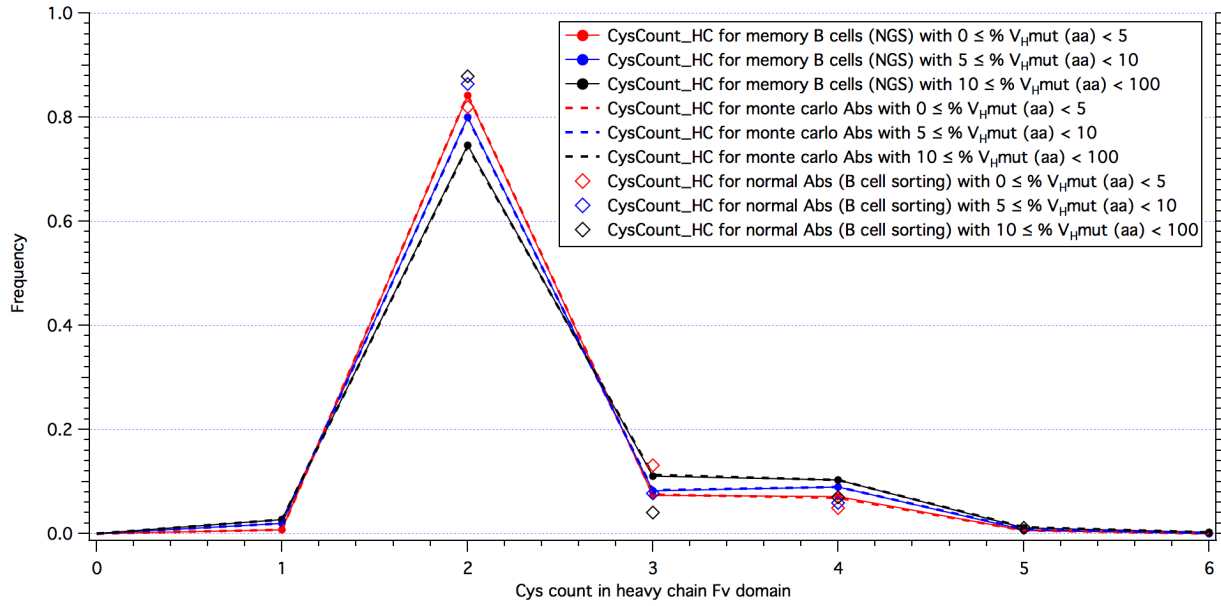

W.

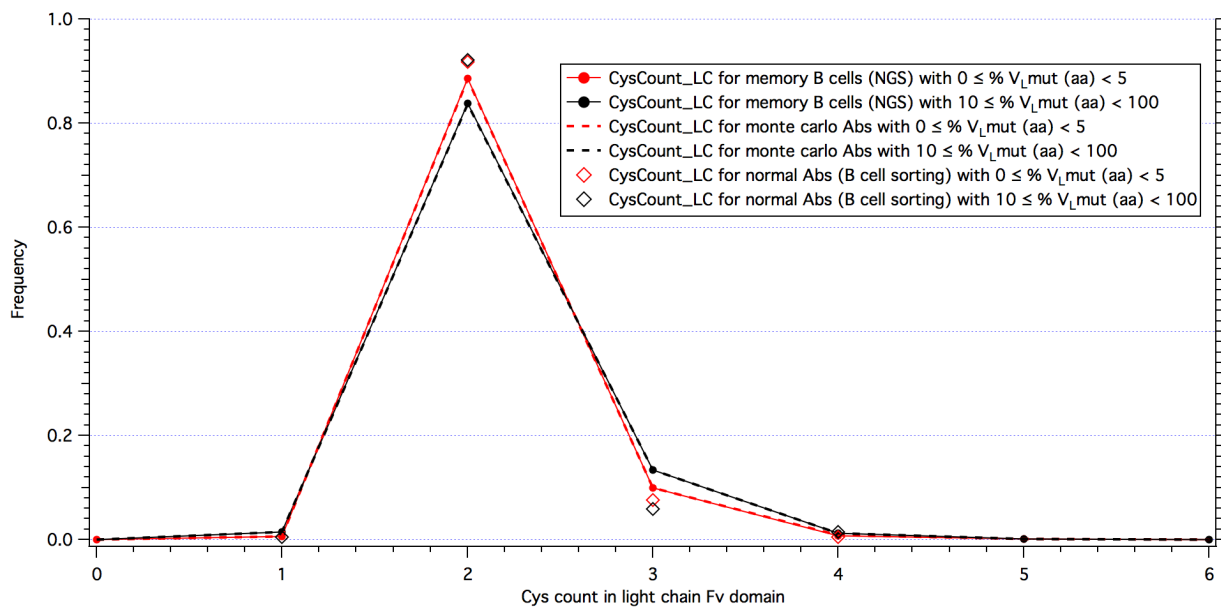

Fig. S1 (continued).
