# Supplementary material for: Minimally Mutated HIV-1 Broadly Neutralizing Antibodies to Guide Reductionist Vaccine Design
Source: PubMed Central journal article supplement (PMC4999182; doi:10.1371/journal.ppat.1005815), 2016-08-25
Supplement: ppat.1005815.s004.pdf [file ppat.1005815.s004.pdf]

A.

|                   |                  |                  |                  |                  |                  |                  |
|-------------------|------------------|------------------|------------------|------------------|------------------|------------------|
| SeqID             | VRC-CH34         | VRC-CH30         | VRC-CH31         | VRC-CH32         | VRC-CH33         | 3BNC117          |
| VJ                | HV1-2_HD6-12_HJ5 | HV1-2_HD3-16_HJ5 | HV1-2_HD1-7_HJ1  | HV1-2_HD1-26_HJ4 | HV1-2_HD3-10_HJ5 | HV1-2_HD6-25_HJ2 |
| fVDJ              | 0.000457         | 0.000409         | 8.6e-06          | 0.00118          | 0.00102          | 8.9e-06          |
| VJ                | KV1D-33_KJ2      | KV1D-33_KJ2      | KV1D-33_KJ2      | KV1D-33_KJ2      | KV1D-33_KJ2      | KV1D-33_KJ3      |
| fVL VH            | 0.0493           | 0.0493           | 0.0493           | 0.0493           | 0.0493           | 0.0493           |
| fJL JL            | 0.276            | 0.276            | 0.276            | 0.276            | 0.276            | 0.204            |
| VHmut             | 35.2             | 36.2             | 36.2             | 35.2             | 36.2             | 36               |
| fVHmut            | 1e-05            | 1e-05            | 1e-05            | 1e-05            | 1e-05            | 1e-05            |
| VLmut             | 21.6             | 20.5             | 22.7             | 23.9             | 25               | 23.8             |
| fVLmut            | 0.00019          | 0.00019          | 7.61e-05         | 7.61e-05         | 1.9e-05          | 7.61e-05         |
| rFRtoVmut_H       | 0.98             | 1                | 0.955            | 0.929            | 0.955            | 0.989            |
| f_rFRtoVmut_H     | 0.223            | 0.0405           | 0.223            | 0.223            | 0.223            | 0.223            |
| rFRtoVmut_L       | 1.14             | 1.11             | 1.16             | 1.19             | 1.21             | 1.43             |
| f_rFRtoVmut_L     | 0.0187           | 0.0187           | 0.0187           | 0.0187           | 0.0019           | 3.49e-05         |
| HCDR3             | 15.0             | 15.0             | 15.0             | 15.0             | 15.0             | 12.0             |
| fHCDR3            | 0.112            | 0.112            | 0.112            | 0.112            | 0.112            | 0.0863           |
| LCDR3             | 5.0              | 5.0              | 5.0              | 5.0              | 5.0              | 5.0              |
| fLCDR3            | 0.00615          | 0.00615          | 0.00615          | 0.00615          | 0.00615          | 0.00615          |
| InsCount_H        | 1                | 1                | 1                | 1                | 1                | 1                |
| InsSizes_H        | 27               | 27               | 27               | 27               | 27               | 12               |
| fInsSizes_H VHmut | 3.35e-05         | 3.35e-05         | 3.35e-05         | 3.35e-05         | 3.35e-05         | 0.0051           |
| DelCount_H        | 0                | 0                | 0                | 0                | 0                | 0                |
| DelSizes_H        | 0                | 0                | 0                | 0                | 0                | 0                |
| fDelSizes_H VHmut | 0.974            | 0.974            | 0.974            | 0.974            | 0.974            | 0.974            |
| InsCount_L        | 0                | 0                | 0                | 0                | 0                | 0                |
| InsSizes_L        | 0                | 0                | 0                | 0                | 0                | 0                |
| fInsSizes_L VLmut | 0.954            | 0.954            | 0.954            | 0.954            | 0.954            | 0.954            |
| DelCount_L        | 0                | 0                | 0                | 0                | 0                | 1                |
| DelSizes_L        | 0                | 0                | 0                | 0                | 0                | 12               |
| fDelSizes_L VLmut | 0.985            | 0.985            | 0.985            | 0.985            | 0.985            | 0.000159         |
| CysCount_H        | 2                | 2                | 2                | 2                | 2                | 2                |
| fCysCount_H VHmut | 0.746            | 0.746            | 0.746            | 0.746            | 0.746            | 0.746            |
| CysCount_L        | 2                | 2                | 2                | 2                | 2                | 2                |
| fCysCount_L VLmut | 0.838            | 0.838            | 0.838            | 0.838            | 0.838            | 0.838            |
| fHL               | 6.5e-25          | 1.06e-25         | 5.01e-27         | 6.7e-25          | 9.22e-27         | 1.32e-31         |
| SeqID             | 12A12            | VRC-PG19         | NIH45-46         | VRC02            | VRC01            | VRC-PG20         |
| VJ                | HV1-2_HD2-2_HJ5  | HV1-2_HD3-3_HJ1  | HV1-2_HD2-8_HJ2  | HV1-2_HD3-16_HJ2 | HV1-2_HD5-18_HJ2 | HV1-2_HD3-10_HJ1 |
| fVDJ              | 0.00116          | 4.4e-05          | 4.4e-06          | 4.4e-05          | 1.76e-05         | 3.08e-05         |
| VJ                | KV1D-33_KJ1      | LV2-14_LJ3       | KV3-20_KJ2       | KV3-20_KJ2       | KV3-20_KJ2       | LV2-14_LJ3       |
| fVL VH            | 0.0493           | 0.00537          | 0.104            | 0.104            | 0.104            | 0.00537          |
| fJL JL            | 0.0531           | 0.227            | 0.289            | 0.289            | 0.289            | 0.227            |
| VHmut             | 34               | 30.5             | 40.6             | 39.6             | 41.7             | 37.5             |
| fVHmut            | 1e-05            | 1e-05            | 1e-05            | 1e-05            | 1e-05            | 1e-05            |
| VLmut             | 23.9             | 20.2             | 27.9             | 31.4             | 29.1             | 27.4             |
| fVLmut            | 7.61e-05         | 0.00019          | 1.9e-05          | 1.9e-05          | 1.9e-05          | 1.9e-05          |
| rFRtoVmut_H       | 0.961            | 1.07             | 0.806            | 0.873            | 0.916            | 0.97             |
| f_rFRtoVmut_H     | 0.223            | 0.0405           | 0.223            | 0.223            | 0.223            | 0.223            |
| rFRtoVmut_L       | 1.19             | 0.933            | 1.22             | 1.14             | 1.1              | 1.24             |
| f_rFRtoVmut_L     | 0.0187           | 0.115            | 0.00119          | 0.0187           | 0.0187           | 0.00119          |
| HCDR3             | 15.0             | 13.0             | 18.0             | 14.0             | 14.0             | 15.0             |
| fHCDR3            | 0.112            | 0.107            | 0.0661           | 0.121            | 0.121            | 0.112            |
| LCDR3             | 5.0              | 5.0              | 5.0              | 5.0              | 5.0              | 5.0              |
| fLCDR3            | 0.00615          | 0.00122          | 0.00615          | 0.00615          | 0.00615          | 0.00122          |
| InsCount_H        | 0                | 0                | 0                | 0                | 0                | 0                |
| InsSizes_H        | 0                | 0                | 0                | 0                | 0                | 0                |
| fInsSizes_H VHmut | 0.985            | 0.985            | 0.985            | 0.985            | 0.985            | 0.985            |
| DelCount_H        | 0                | 0                | 0                | 0                | 0                | 0                |
| DelSizes_H        | 0                | 0                | 0                | 0                | 0                | 0                |
| fDelSizes_H VHmut | 0.974            | 0.974            | 0.974            | 0.974            | 0.974            | 0.974            |
| InsCount_L        | 0                | 1                | 1                | 0                | 1                | 1                |
| InsSizes_L        | 6                | 6                | 6                | 6                | 6                | 6                |
| fInsSizes_L VLmut | 0.954            | 0.00422          | 0.00422          | 0.954            | 0.00422          | 0.00422          |
| DelCount_L        | 0                | 1                | 1                | 1                | 1                | 1                |
| DelSizes_L        | 0                | 3                | 6                | 6                | 6                | 18               |
| fDelSizes_L VLmut | 0.985            | 0.0119           | 0.00191          | 0.00191          | 0.00191          | 0.000717         |
| CysCount_H        | 2                | 4                | 4                | 4                | 4                | 4                |
| fCysCount_H VHmut | 0.746            | 0.746            | 0.103            | 0.103            | 0.103            | 0.746            |
| CysCount_L        | 2                | 2                | 2                | 2                | 2                | 2                |
| fCysCount_L VLmut | 0.838            | 0.838            | 0.838            | 0.838            | 0.838            | 0.838            |
| fHL               | 3.43e-21         | 1.74e-27         | 1.66e-30         | 1.08e-25         | 1.92e-28         | 4.33e-31         |
| SeqID             | 12A21            | 3BNC60           | VRC-PG04B        | VRC-PG04         | VRC18            |                  |
| VJ                | HV1-2_HD2-21_HJ5 | HV1-2_HD6-25_HJ2 | HV1-2_HD2-15_HJ2 | HV1-2_HD2-8_HJ2  | HV1-2_HD3-3_HJ5  |                  |
| fVDJ              | 0.000255         | 8.8e-06          | 3.08e-05         | 4.4e-06          | 0.000655         |                  |
| VJ                | KV1D-33_KJ3      | KV1D-33_KJ3      | KV3-20_KJ5       | KV3-20_KJ5       | KV3-20_KJ4       |                  |
| fVL VH            | 0.0493           | 0.0493           | 0.104            | 0.104            | 0.104            |                  |
| fJL JL            | 0.204            | 0.204            | 0.0823           | 0.0823           | 0.169            |                  |
| VHmut             | 30.9             | 40               | 45.9             | 45.9             | 37.8             |                  |
| fVHmut            | 1e-05            | 1e-05            | 1e-05            | 1e-05            | 1e-05            |                  |
| VLmut             | 22.7             | 27.4             | 31.4             | 31.4             | 22.5             |                  |
| fVLmut            | 7.61e-05         | 1.9e-05          | 1.9e-05          | 1.9e-05          | 7.61e-05         |                  |
| rFRtoVmut_H       | 1                | 0.975            | 0.933            | 0.933            | 0.976            |                  |
| f_rFRtoVmut_H     | 0.0405           | 0.223            | 0.223            | 0.223            | 0.223            |                  |
| rFRtoVmut_L       | 1.08             | 1.38             | 1.14             | 1.14             | 1.01             |                  |
| f_rFRtoVmut_L     | 0.0187           | 0.00119          | 0.0187           | 0.0187           | 0.0187           |                  |
| HCDR3             | 15.0             | 12.0             | 16.0             | 16.0             | 12.0             |                  |
| fHCDR3            | 0.112            | 0.0863           | 0.101            | 0.101            | 0.0863           |                  |
| LCDR3             | 5.0              | 5.0              | 5.0              | 5.0              | 5.0              |                  |
| fLCDR3            | 0.00615          | 0.00615          | 0.00615          | 0.00615          | 0.00615          |                  |
| InsCount_H        | 0                | 1                | 2                | 2                | 1                |                  |
| InsSizes_H        | 0                | 12               | 3-3              | 3-3              | 6                |                  |
| fInsSizes_H VHmut | 0.985            | 0.0051           | 0.00501          | 0.00501          | 0.0112           |                  |
| DelCount_H        | 0                | 0                | 0                | 0                | 0                |                  |
| DelSizes_H        | 0                | 0                | 0                | 0                | 0                |                  |
| fDelSizes_H VHmut | 0.974            | 0.974            | 0.974            | 0.974            | 0.974            |                  |
| InsCount_L        | 0                | 0                | 0                | 0                | 0                |                  |
| InsSizes_L        | 0                | 0                | 0                | 0                | 0                |                  |
| fInsSizes_L VLmut | 0.954            | 0.954            | 0.954            | 0.954            | 0.954            |                  |
| DelCount_L        | 0                | 1                | 1                | 1                | 0                |                  |
| DelSizes_L        | 0                | 12               | 9                | 9                | 0                |                  |
| fDelSizes_L VLmut | 0.985            | 0.000159         | 0.000398         | 0.000398         | 0.985            |                  |
| CysCount_H        | 2                | 2                | 2                | 2                | 2                |                  |
| fCysCount_H VHmut | 0.746            | 0.746            | 0.746            | 0.746            | 0.746            |                  |
| CysCount_L        | 2                | 2                | 2                | 2                | 2                |                  |
| fCysCount_L VLmut | 0.838            | 0.838            | 0.838            | 0.838            | 0.838            |                  |
| fHL               | 5.28e-22         | 1.12e-30         | 1.51e-28         | 2.16e-29         | 1.25e-22         |                  |

B.

| SeqID             | MinVRC01         | Min12A21         | 5fH6fL           |
|-------------------|------------------|------------------|------------------|
| VDJ               | HV1-2_HD2-15_HJ1 | HV1-2_HD2-21_HJ5 | HV1-2_HD2-15_HJ1 |
| fVDJ              | 3.52e-05         | 0.000255         | 3.52e-05         |
| VJ                | KV3-11_KJ2       | KV1D-33_KJ3      | KV3-11_KJ2       |
| fVL VH            | 0.0296           | 0.0493           | 0.0296           |
| fJL VL            | 0.192            | 0.204            | 0.192            |
| VHmut             | 14.6             | 17.7             | 19.8             |
| fVHmut            | 0.0422           | 0.0203           | 0.00831          |
| VLmut             | 10.5             | 9.09             | 15.1             |
| fVLmut            | 0.0492           | 0.118            | 0.00748          |
| rFRtoVmut_H       | 0.873            | 0.924            | 0.735            |
| f_rFRtoVmut_H     | 0.223            | 0.223            | 0.441            |
| rFRtoVmut_L       | 1.08             | 0.623            | 1.12             |
| f_rFRtoVmut_L     | 0.0187           | 0.286            | 0.0187           |
| HCDR3             | 14.0             | 15.0             | 14.0             |
| fHCDR3            | 0.121            | 0.112            | 0.121            |
| LCDR3             | 5.0              | 5.0              | 5.0              |
| fLCDR3            | 0.00615          | 0.00615          | 0.00615          |
| InsCount_H        | 0                | 0                | 0                |
| InsSizes_H        | 0                | 0                | 0                |
| fInsSizes_H VHmut | 0.905            | 0.905            | 0.905            |
| DelCount_H        | 0                | 0                | 0                |
| DelSizes_H        | 0                | 0                | 0                |
| fDelSizes_H VHmut | 0.974            | 0.974            | 0.974            |
| InsCount_L        | 0                | 0                | 1                |
| InsSizes_L        | 0                | 0                | 6                |
| fInsSizes_L VLmut | 0.954            | 0.954            | 0.00422          |
| DelCount_L        | 1                | 0                | 1                |
| DelSizes_L        | 6                | 0                | 6                |
| fDelSizes_L VLmut | 0.00191          | 0.985            | 0.00191          |
| CysCount_H        | 4                | 2                | 4                |
| fCysCount_H VHmut | 0.103            | 0.746            | 0.103            |
| CysCount_L        | 2                | 2                | 2                |
| fCysCount_L VLmut | 0.838            | 0.838            | 0.838            |
| fHL               | 1.78e-19         | 1.4e-13          | 4.67e-23         |

C.

|                   |                  |
|-------------------|------------------|
| SeqID             | 10E8             |
| VDJ               | HV3-15_HD3-3_HJ1 |
| fVDJ              | 2.2e-05          |
| VJ                | LV3-19_LJ3       |
| fVL VH            | 0.0128           |
| fJL VL            | 0.791            |
| VHmut             | 26.5             |
| fVHmut            | 6.02e-05         |
| VLmut             | 20.7             |
| fVLmut            | 0.00019          |
| rFRtoVmut_H       | 1.03             |
| f_rFRtoVmut_H     | 0.0405           |
| rFRtoVmut_L       | 0.912            |
| f_rFRtoVmut_L     | 0.115            |
| HCDR3             | 22.0             |
| fHCDR3            | 0.0209           |
| LCDR3             | 12.0             |
| fLCDR3            | 0.114            |
| InsCount_H        | 0                |
| InsSizes_H        | 0                |
| fInsSizes_H VHmut | 0.905            |
| DelCount_H        | 0                |
| DelSizes_H        | 0                |
| fDelSizes_H VHmut | 0.974            |
| InsCount_L        | 0                |
| InsSizes_L        | 0                |
| fInsSizes_L VLmut | 0.954            |
| DelCount_L        | 0                |
| DelSizes_L        | 0                |
| fDelSizes_L VLmut | 0.985            |
| CysCount_H        | 2                |
| fCysCount_H VHmut | 0.746            |
| CysCount_L        | 2                |
| fCysCount_L VLmut | 0.838            |
| fHL               | 1.47e-20         |

D.

| SeqID             | 10E8_19fh10fL    | 10E8_10fh16fL    | 10E8_10fh10fL    | 10E8_2fh10fL     |
|-------------------|------------------|------------------|------------------|------------------|
| VDJ               | HV3-15_HD3-3_HJ1 | HV3-15_HD3-3_HJ1 | HV3-15_HD3-3_HJ1 | HV3-15_HD3-3_HJ1 |
| fVDJ              | 2.2e-05          | 2.2e-05          | 2.2e-05          | 2.2e-05          |
| VJ                | LV3-19_LJ3       | LV3-19_LJ3       | LV3-19_LJ3       | LV3-19_LJ3       |
| fVL VH            | 0.0128           | 0.0128           | 0.0128           | 0.0128           |
| fJL VL            | 0.791            | 0.791            | 0.791            | 0.791            |
| VHmut             | 26.5             | 18.4             | 18.4             | 12.2             |
| fVHmut            | 6.02e-05         | 0.00831          | 0.00831          | 0.091            |
| VLmut             | 13.8             | 20.7             | 13.8             | 13.8             |
| fVLmut            | 0.0225           | 0.00019          | 0.0225           | 0.0225           |
| rFRtoVmut_H       | 1.03             | 0.792            | 0.792            | 0.297            |
| f_rFRtoVmut_H     | 0.0405           | 0.441            | 0.441            | 0.0416           |
| rFRtoVmut_L       | 0.684            | 0.912            | 0.684            | 0.684            |
| f_rFRtoVmut_L     | 0.286            | 0.115            | 0.286            | 0.286            |
| HCDR3             | 22.0             | 22.0             | 22.0             | 22.0             |
| fHCDR3            | 0.0209           | 0.0209           | 0.0209           | 0.0209           |
| LCDR3             | 12.0             | 12.0             | 12.0             | 12.0             |
| fLCDR3            | 0.114            | 0.114            | 0.114            | 0.114            |
| InsCount_H        | 0                | 0                | 0                | 0                |
| InsSizes_H        | 0                | 0                | 0                | 0                |
| fInsSizes_H VHmut | 0.905            | 0.905            | 0.905            | 0.905            |
| DelCount_H        | 0                | 0                | 0                | 0                |
| DelSizes_H        | 0                | 0                | 0                | 0                |
| fDelSizes_H VHmut | 0.974            | 0.974            | 0.974            | 0.974            |
| InsCount_L        | 0                | 0                | 0                | 0                |
| InsSizes_L        | 0                | 0                | 0                | 0                |
| fInsSizes_L VLmut | 0.954            | 0.954            | 0.954            | 0.954            |
| DelCount_L        | 0                | 0                | 0                | 0                |
| DelSizes_L        | 0                | 0                | 0                | 0                |
| fDelSizes_L VLmut | 0.985            | 0.985            | 0.985            | 0.985            |
| CysCount_H        | 2                | 2                | 2                | 2                |
| fCysCount_H VHmut | 0.746            | 0.746            | 0.746            | 0.746            |
| CysCount_L        | 2                | 2                | 2                | 2                |
| fCysCount_L VLmut | 0.838            | 0.838            | 0.838            | 0.838            |
| fHL               | 4.29e-18         | 2.2e-17          | 6.45e-15         | 6.66e-15         |

E.

| SeqID             | PGT141           | PGT143           | PGT145           | PGT144           | PGT142           | PGDM1400         |
|-------------------|------------------|------------------|------------------|------------------|------------------|------------------|
| VDJ               | HV1-8_HD4-17_HJ6 | HV1-8_HD4-17_HJ6 | HV1-8_HD4-17_HJ6 | HV1-8_HD4-17_HJ6 | HV1-8_HD4-17_HJ6 | HV1-8_HD4-17_HJ6 |
| FVDJ              | 0.00011          | 0.00011          | 0.00011          | 0.00011          | 0.00011          | 0.00011          |
| VJ                | KV2D-28_KJ1      | KV2D-28_KJ1      | KV2D-28_KJ1      | KV2D-28_KJ1      | KV2D-28_KJ1      | KV2D-28_KJ1      |
| FVL VH            | 0.0228           | 0.0228           | 0.0228           | 0.0228           | 0.0228           | 0.0228           |
| FJL VL            | 0.239            | 0.239            | 0.239            | 0.239            | 0.239            | 0.239            |
| VHmut             | 27.1             | 27.1             | 28.1             | 29.2             | 29.2             | 45.8             |
| FVHmut            | 6.02e-05         | 6.02e-05         | 2.01e-05         | 2.01e-05         | 2.01e-05         | 1e-05            |
| VLmut             | 19.4             | 20.4             | 24.7             | 21.5             | 19.4             | 22.6             |
| FVLmut            | 0.00097          | 0.00019          | 1.9e-05          | 0.00019          | 0.00097          | 7.61e-05         |
| rFRtoVmut_H       | 1.01             | 1.01             | 0.97             | 1.12             | 0.997            | 1.03             |
| f_rFRtoVmut_H     | 0.0405           | 0.0405           | 0.223            | 0.0405           | 0.223            | 0.0405           |
| rFRtoVmut_L       | 0.975            | 1.02             | 0.687            | 0.965            | 0.975            | 0.668            |
| f_rFRtoVmut_L     | 0.115            | 0.0187           | 0.286            | 0.115            | 0.115            | 0.286            |
| HCDR3             | 34.0             | 34.0             | 33.0             | 34.0             | 34.0             | 34.0             |
| fHCDR3            | 5.28e-05         | 5.28e-05         | 5.28e-05         | 5.28e-05         | 5.28e-05         | 5.28e-05         |
| LCDR3             | 9.0              | 9.0              | 9.0              | 9.0              | 9.0              | 9.0              |
| fLCDR3            | 0.668            | 0.668            | 0.668            | 0.668            | 0.668            | 0.668            |
| InsCount_H        | 0                | 0                | 0                | 0                | 0                | 0                |
| InsSizes_H        | 0                | 0                | 0                | 0                | 0                | 0                |
| fInsSizes_H VHmut | 0.985            | 0.985            | 0.985            | 0.985            | 0.985            | 0.985            |
| DelCount_H        | 0                | 0                | 0                | 0                | 0                | 0                |
| DelSizes_H        | 0                | 0                | 0                | 0                | 0                | 0                |
| fDelSizes_H VHmut | 0.974            | 0.974            | 0.974            | 0.974            | 0.974            | 0.974            |
| InsCount_L        | 0                | 0                | 0                | 0                | 0                | 0                |
| InsSizes_L        | 0                | 0                | 0                | 0                | 0                | 0                |
| fInsSizes_L VHmut | 0.954            | 0.954            | 0.954            | 0.954            | 0.954            | 0.954            |
| DelCount_L        | 0                | 0                | 0                | 0                | 0                | 0                |
| DelSizes_L        | 0                | 0                | 0                | 0                | 0                | 0                |
| fDelSizes_L VHmut | 0.985            | 0.985            | 0.985            | 0.985            | 0.985            | 0.985            |
| CysCount_H        | 2                | 2                | 2                | 2                | 2                | 2                |
| fcysCount_H VHmut | 0.746            | 0.746            | 0.746            | 0.746            | 0.746            | 0.746            |
| CysCount_L        | 2                | 2                | 2                | 2                | 2                | 2                |
| fcysCount_L VHmut | 0.838            | 0.838            | 0.134            | 0.838            | 0.838            | 0.838            |
| fHL               | 2.99e-21         | 9.49e-23         | 4.25e-23         | 1.96e-22         | 5.48e-21         | 9.7e-23          |

| SeqID             | CAP256-VRC26.08  | PG16             | PG9              |
|-------------------|------------------|------------------|------------------|
| VDJ               | HV3-30_HD3-3_HJ3 | HV3-33_HD3-3_HJ6 | HV3-33_HD3-3_HJ6 |
| FVDJ              | 0.000268         | 0.000418         | 0.000418         |
| VJ                | LV1-51_LJ1       | LV2-14_LJ3       | LV2-14_LJ3       |
| FVL VH            | 0.0401           | 0.00351          | 0.00351          |
| FJL VL            | 0.152            | 0.227            | 0.227            |
| VHmut             | 14.7             | 21.9             | 17.4             |
| FVHmut            | 0.0422           | 0.00321          | 0.0203           |
| VLmut             | 10.1             | 17.8             | 10               |
| FVLmut            | 0.0492           | 0.00278          | 0.0492           |
| rFRtoVmut_H       | 0.864            | 1.08             | 1.05             |
| f_rFRtoVmut_H     | 0.223            | 0.0405           | 0.0405           |
| rFRtoVmut_L       | 0.746            | 1.06             | 0.755            |
| f_rFRtoVmut_L     | 0.286            | 0.0187           | 0.286            |
| HCDR3             | 39.0             | 30.0             | 30.0             |
| fHCDR3            | 4.4e-06          | 0.000449         | 0.000449         |
| LCDR3             | 12.0             | 10.0             | 10.0             |
| fLCDR3            | 0.114            | 0.217            | 0.217            |
| InsCount_H        | 0                | 0                | 0                |
| InsSizes_H        | 0                | 0                | 0                |
| fInsSizes_H VHmut | 0.905            | 0.905            | 0.905            |
| DelCount_H        | 0                | 0                | 0                |
| DelSizes_H        | 0                | 0                | 0                |
| fDelSizes_H VHmut | 0.974            | 0.974            | 0.974            |
| InsCount_L        | 0                | 0                | 0                |
| InsSizes_L        | 0                | 0                | 0                |
| fInsSizes_L VHmut | 0.954            | 0.954            | 0.954            |
| DelCount_L        | 0                | 0                | 0                |
| DelSizes_L        | 0                | 0                | 0                |
| fDelSizes_L VHmut | 0.985            | 0.985            | 0.985            |
| CysCount_H        | 2                | 2                | 2                |
| fcysCount_H VHmut | 0.103            | 0.746            | 0.746            |
| CysCount_L        | 2                | 2                | 2                |
| fcysCount_L VHmut | 0.838            | 0.838            | 0.838            |
| fHL               | 7.69e-18         | 1.14e-19         | 1.95e-16         |

F.

| SeqID             | CH02              | CH03              | CH04              | CH01              |
|-------------------|-------------------|-------------------|-------------------|-------------------|
| VDJ               | HV3-20_HD3-10_HJ2 | HV3-20_HD3-10_HJ2 | HV3-20_HD3-10_HJ2 | HV3-20_HD3-10_HJ2 |
| FVDJ              | 2.2e-05           | 2.2e-05           | 2.2e-05           | 2.2e-05           |
| VJ                | KV3-20_KJ1        | KV3-20_KJ1        | KV3-20_KJ1        | KV3-20_KJ1        |
| FVL VH            | 0.122             | 0.122             | 0.122             | 0.122             |
| FJL VL            | 0.342             | 0.342             | 0.342             | 0.342             |
| VHmut             | 22.9              | 22.9              | 24                | 29.2              |
| FVHmut            | 0.000642          | 0.000642          | 0.000642          | 2.01e-05          |
| VLmut             | 23.6              | 19.1              | 16.9              | 0                 |
| FVLmut            | 7.61e-05          | 0.00097           | 0.00278           | 0.00278           |
| rFRtoVmut_H       | 1.19              | 1.35              | 0.911             | 1.18              |
| f_rFRtoVmut_H     | 0.0405            | 0.00141           | 0.223             | 0.0405            |
| rFRtoVmut_L       | 1.04              | 1.09              | 1.23              | 0.996             |
| f_rFRtoVmut_L     | 0.0187            | 0.0187            | 0.00119           | 0.115             |
| HCDR3             | 26.0              | 26.0              | 26.0              | 26.0              |
| fHCDR3            | 0.00275           | 0.00275           | 0.00275           | 0.00275           |
| LCDR3             | 9.0               | 9.0               | 9.0               | 9.0               |
| fLCDR3            | 0.668             | 0.668             | 0.668             | 0.668             |
| InsCount_H        | 0                 | 0                 | 0                 | 0                 |
| InsSizes_H        | 0                 | 0                 | 0                 | 0                 |
| fInsSizes_H VHmut | 0.905             | 0.905             | 0.905             | 0.905             |
| DelCount_H        | 0                 | 0                 | 0                 | 0                 |
| DelSizes_H        | 0                 | 0                 | 0                 | 0                 |
| fDelSizes_H VHmut | 0.974             | 0.974             | 0.974             | 0.974             |
| InsCount_L        | 0                 | 0                 | 0                 | 0                 |
| InsSizes_L        | 0                 | 0                 | 0                 | 0                 |
| fInsSizes_L VHmut | 0.954             | 0.954             | 0.954             | 0.954             |
| DelCount_L        | 0                 | 0                 | 0                 | 0                 |
| DelSizes_L        | 0                 | 0                 | 0                 | 0                 |
| fDelSizes_L VHmut | 0.985             | 0.985             | 0.985             | 0.985             |
| CysCount_H        | 2                 | 2                 | 2                 | 2                 |
| fcysCount_H VHmut | 0.746             | 0.746             | 0.746             | 0.746             |
| CysCount_L        | 2                 | 2                 | 2                 | 2                 |
| fcysCount_L VHmut | 0.838             | 0.838             | 0.838             | 0.838             |
| fHL               | 3.24e-20          | 1.43e-20          | 4.13e-19          | 2.29e-19          |

G.

| SeqID             | CH104            | CH106            | CH103            |
|-------------------|------------------|------------------|------------------|
| VDJ               | HV4-59_HD3-9_HJ4 | HV4-59_HD3-9_HJ4 | HV4-59_HD3-9_HJ4 |
| fVDJ              | 0.000717         | 0.000717         | 0.000717         |
| VJ                | LV3-1_LJ1        | LV3-1_LJ1        | LV3-1_LJ1        |
| fVL VH            | 0.0279           | 0.0279           | 0.0279           |
| fJL VL            | 0.25             | 0.25             | 0.25             |
| VHmut             | 22.1             | 23.2             | 22.1             |
| fVHmut            | 0.000642         | 0.000642         | 0.000642         |
| VLmut             | 21.8             | 23               | 23.8             |
| fVLmut            | 0.00019          | 7.61e-05         | 7.61e-05         |
| rFRtoVmut_H       | 0.905            | 0.864            | 0.905            |
| f_rFRtoVmut_H     | 0.223            | 0.223            | 0.223            |
| rFRtoVmut_L       | 0.95             | 0.903            | 1.19             |
| f_rFRtoVmut_L     | 0.115            | 0.115            | 0.0187           |
| HCDR3             | 15.0             | 15.0             | 15.0             |
| fHCDR3            | 0.112            | 0.112            | 0.112            |
| LCDR3             | 10.0             | 10.0             | 10.0             |
| fLCDR3            | 0.217            | 0.217            | 0.217            |
| InsCount_H        | 0                | 0                | 0                |
| InsSizes_H        | 0                | 0                | 0                |
| fInsSizes_H VHmut | 0.905            | 0.905            | 0.905            |
| DelCount_H        | 0                | 0                | 0                |
| DelSizes_H        | 0                | 0                | 0                |
| fDelSizes_H VHmut | 0.974            | 0.974            | 0.974            |
| InsCount_L        | 0                | 0                | 0                |
| InsSizes_L        | 0                | 0                | 0                |
| fInsSizes_L VLmut | 0.954            | 0.954            | 0.954            |
| DelCount_L        | 0                | 0                | 1                |
| DelSizes_L        | 0                | 0                | 9                |
| fDelSizes_L VLmut | 0.985            | 0.985            | 0.000398         |
| CysCount_H        | 2                | 2                | 2                |
| fCysCount_H VHmut | 0.746            | 0.746            | 0.746            |
| CysCount_L        | 3                | 3                | 3                |
| fCysCount_L VLmut | 0.134            | 0.134            | 0.134            |
| fHL               | 3.15e-17         | 1.26e-17         | 8.23e-22         |

# H.

| SeqID             | PGT151             | PGT156              | PGT154             | PGT158              | PGT155              | PGT153            |
|-------------------|--------------------|---------------------|--------------------|---------------------|---------------------|-------------------|
| VDJ               | HV3-30-3_HD3-3_HJ6 | HV3-30-3_HD2-15_HJ6 | HV3-30-3_HD3-3_HJ6 | HV3-30-3_HD3-16_HJ6 | HV3-30-3_HD2-15_HJ6 | HV3-30_HD2-15_HJ6 |
| fVDJ              | 0.000374           | 0.000343            | 0.000374           | 0.000163            | 0.000343            | 0.000774          |
| VJ                | KV2D-29_KJ4        | KV2D-29_KJ4         | KV2D-29_KJ4        | KV2D-29_KJ4         | KV2-29_KJ4          | KV2D-29_KJ4       |
| fVL VH            | 0.00257            | 0.00257             | 0.00257            | 0.00257             | 0.000642            | 0.00321           |
| fJL VL            | 0.305              | 0.305               | 0.305              | 0.305               | 0.234               | 0.305             |
| VHmut             | 28.1               | 30.2                | 26                 | 29.5                | 29.2                | 27.1              |
| fVHmut            | 2.01e-05           | 1e-05               | 6.02e-05           | 2.01e-05            | 2.01e-05            | 6.02e-05          |
| VLmut             | 12.9               | 17.2                | 20.4               | 16.1                | 16.1                | 16.1              |
| fVLmut            | 0.0225             | 0.00278             | 0.00019            | 0.00278             | 0.00278             | 0.00278           |
| rFRtoVmut_H       | 0.84               | 0.963               | 0.838              | 0.864               | 0.935               | 0.806             |
| f_rFRtoVmut_H     | 0.223              | 0.223               | 0.223              | 0.223               | 0.223               | 0.223             |
| rFRtoVmut_L       | 1.02               | 0.658               | 0.831              | 0.702               | 0.702               | 0.936             |
| f_rFRtoVmut_L     | 0.0187             | 0.286               | 0.115              | 0.286               | 0.286               | 0.115             |
| HCDR3             | 28.0               | 28.0                | 28.0               | 28.0                | 28.0                | 28.0              |
| fHCDR3            | 0.000668           | 0.000668            | 0.000668           | 0.000668            | 0.000668            | 0.000668          |
| LCDR3             | 9.0                | 9.0                 | 9.0                | 9.0                 | 9.0                 | 9.0               |
| fLCDR3            | 0.668              | 0.668               | 0.668              | 0.668               | 0.668               | 0.668             |
| InsCount_H        | 0                  | 0                   | 0                  | 0                   | 0                   | 0                 |
| InsSizes_H        | 0                  | 0                   | 0                  | 0                   | 0                   | 0                 |
| fInsSizes_H VHmut | 0.905              | 0.905               | 0.905              | 0.905               | 0.905               | 0.905             |
| DeLCount_H        | 0                  | 0                   | 0                  | 0                   | 0                   | 0                 |
| DeLSizes_H        | 0                  | 0                   | 0                  | 0                   | 0                   | 0                 |
| fDeLSizes_H VHmut | 0.974              | 0.974               | 0.974              | 0.974               | 0.974               | 0.974             |
| InsCount_L        | 0                  | 0                   | 0                  | 0                   | 0                   | 0                 |
| InsSizes_L        | 0                  | 0                   | 0                  | 0                   | 0                   | 0                 |
| fInsSizes_L VLmut | 0.954              | 0.954               | 0.954              | 0.954               | 0.954               | 0.954             |
| DeLCount_L        | 0                  | 0                   | 0                  | 0                   | 0                   | 0                 |
| DeLSizes_L        | 0                  | 0                   | 0                  | 0                   | 0                   | 0                 |
| fDeLSizes_L VLmut | 0.985              | 0.985               | 0.985              | 0.985               | 0.985               | 0.985             |
| CysCount_H        | 2                  | 2                   | 2                  | 2                   | 2                   | 2                 |
| fCysCount_H VHmut | 0.746              | 0.746               | 0.746              | 0.746               | 0.746               | 0.746             |
| CysCount_L        | 2                  | 2                   | 2                  | 2                   | 2                   | 2                 |
| fCysCount_L VLmut | 0.838              | 0.838               | 0.838              | 0.838               | 0.838               | 0.838             |
| fHL               | 1.27e-19           | 1.1e-19             | 2e-20              | 1.05e-19            | 4.24e-20            | 7.55e-19          |

| SeqID             | PGT157              | PGT152             |
|-------------------|---------------------|--------------------|
| VDJ               | HV3-30-3_HD2-21_HJ6 | HV3-30-3_HD3-3_HJ6 |
| fVDJ              | 0.000158            | 0.000374           |
| VJ                | KV2D-29_KJ4         | KV2D-29_KJ4        |
| fVL VH            | 0.00257             | 0.00257            |
| fJL VL            | 0.305               | 0.305              |
| VHmut             | 27.4                | 29.2               |
| fVHmut            | 6.02e-05            | 2.01e-05           |
| VLmut             | 14                  | 11.8               |
| fVLmut            | 0.0225              | 0.0492             |
| rFRtoVmut_H       | 0.864               | 0.873              |
| f_rFRtoVmut_H     | 0.223               | 0.223              |
| rFRtoVmut_L       | 0.81                | 0.957              |
| f_rFRtoVmut_L     | 0.115               | 0.115              |
| HCDR3             | 28.0                | 28.0               |
| fHCDR3            | 0.000668            | 0.000668           |
| LCDR3             | 9.0                 | 9.0                |
| fLCDR3            | 0.668               | 0.668              |
| InsCount_H        | 0                   | 0                  |
| InsSizes_H        | 0                   | 0                  |
| fInsSizes_H VHmut | 0.905               | 0.905              |
| DeLCount_H        | 0                   | 0                  |
| DeLSizes_H        | 0                   | 0                  |
| fDeLSizes_H VHmut | 0.974               | 0.974              |
| InsCount_L        | 0                   | 0                  |
| InsSizes_L        | 0                   | 0                  |
| fInsSizes_L VLmut | 0.954               | 0.954              |
| DeLCount_L        | 0                   | 0                  |
| DeLSizes_L        | 0                   | 0                  |
| fDeLSizes_L VLmut | 0.985               | 0.985              |
| CysCount_H        | 2                   | 2                  |
| fCysCount_H VHmut | 0.746               | 0.746              |
| CysCount_L        | 2                   | 2                  |
| fCysCount_L VLmut | 0.838               | 0.838              |
| fHL               | 9.98e-19            | 1.72e-18           |

I.

| SeqID             | PGT128           | PGT122           | PGT123            | PGT121           | PGT126           | PGT127           |
|-------------------|------------------|------------------|-------------------|------------------|------------------|------------------|
| VDJ               | HV4-39_HD3-3_HJ5 | HV4-59_HD3-3_HJ6 | HV4-59_HD3-10_HJ6 | HV4-59_HD3-3_HJ6 | HV4-39_HD3-3_HJ5 | HV4-39_HD3-7_HJ5 |
| fVDJ              | 0.00127          | 0.000844         | 0.00134           | 0.000844         | 0.00127          | 0.000295         |
| VJ                | LV2-8_LJ3        | LV3-21_LJ3       | LV3-21_LJ3        | LV3-21_LJ3       | LV2-8_LJ3        | LV2-8_LJ3        |
| fVL VH            | 0.0187           | 0.0275           | 0.0275            | 0.0275           | 0.0187           | 0.0187           |
| fJL VL            | 0.439            | 0.716            | 0.716             | 0.716            | 0.439            | 0.439            |
| VHmut             | 31.1             | 26.3             | 29.5              | 25.3             | 24.3             | 25.2             |
| fVHmut            | 1e-05            | 6.02e-05         | 2.01e-05          | 0.000431         | 0.000431         | 0.000431         |
| VLmut             | 11.8             | 28               | 36.6              | 31.2             | 12.9             | 10.6             |
| fVLmut            | 0.0492           | 1.9e-05          | 1.9e-05           | 1.9e-05          | 0.0225           | 0.0492           |
| rFRtoVmut_H       | 0.761            | 0.967            | 0.987             | 1.01             | 0.749            | 0.72             |
| f_rFRtoVmut_H     | 0.441            | 0.223            | 0.223             | 0.0405           | 0.441            | 0.441            |
| rFRtoVmut_L       | 1.12             | 0.828            | 0.781             | 0.743            | 1.02             | 1.07             |
| f_rFRtoVmut_L     | 0.0187           | 0.115            | 0.286             | 0.286            | 0.0187           | 0.0187           |
| HCDR3             | 21.0             | 26.0             | 26.0              | 26.0             | 21.0             | 21.0             |
| fHCDR3            | 0.0298           | 0.00275          | 0.00275           | 0.00275          | 0.0298           | 0.0298           |
| LCDR3             | 10.0             | 12.0             | 12.0              | 10.0             | 10.0             | 10.0             |
| fLCDR3            | 0.217            | 0.114            | 0.114             | 0.114            | 0.217            | 0.217            |
| InsCount_H        | 1                | 0                | 0                 | 0                | 1                | 1                |
| InsSizes_H        | 18               | 0                | 0                 | 0                | 18               | 18               |
| fInsSizes_H VHmut | 0.00123          | 0.905            | 0.905             | 0.905            | 0.00123          | 0.00123          |
| DeLCount_H        | 0                | 0                | 0                 | 0                | 0                | 0                |
| DeLSizes_H        | 0                | 0                | 0                 | 0                | 0                | 0                |
| fDeLSizes_H VHmut | 0.974            | 0.974            | 0.974             | 0.974            | 0.974            | 0.974            |
| InsCount_L        | 0                | 1                | 1                 | 1                | 0                | 0                |
| InsSizes_L        | 0                | 9                | 9                 | 9                | 0                | 0                |
| fInsSizes_L VLmut | 0.954            | 0.000716         | 0.000716          | 0.000716         | 0.954            | 0.954            |
| DeLCount_L        | 1                | 1                | 1                 | 1                | 1                | 1                |
| DeLSizes_L        | 15               | 21               | 21                | 21               | 15               | 15               |
| fDeLSizes_L VLmut | 0.000319         | 3.49e-05         | 3.49e-05          | 3.49e-05         | 0.000319         | 0.000319         |
| CysCount_H        | 4                | 2                | 2                 | 2                | 4                | 4                |
| fCysCount_H VHmut | 0.103            | 0.746            | 0.746             | 0.746            | 0.103            | 0.103            |
| CysCount_L        | 2                | 2                | 2                 | 2                | 2                | 2                |
| fCysCount_L VLmut | 0.838            | 0.838            | 0.838             | 0.838            | 0.838            | 0.838            |
| fHL               | 8.64e-24         | 2.77e-27         | 2.77e-27          | 6.84e-27         | 1.7e-22          | 8.61e-23         |

| SeqID             | PGT125            | PGT131           | PGT130            |
|-------------------|-------------------|------------------|-------------------|
| VDJ               | HV4-39_HD3-10_HJ5 | HV4-39_HD3-9_HJ5 | HV4-39_HD3-10_HJ5 |
| fVDJ              | 0.00192           | 0.000334         | 0.00192           |
| VJ                | LV2-8_LJ3         | LV2-8_LJ3        | LV2-8_LJ3         |
| fVL VH            | 0.0187            | 0.0187           | 0.0187            |
| fJL VL            | 0.439             | 0.439            | 0.439             |
| VHmut             | 29.1              | 29.9             | 29.9              |
| fVHmut            | 2.01e-05          | 2.01e-05         | 2.01e-05          |
| VLmut             | 21.2              | 22.2             | 20                |
| fVLmut            | 0.00019           | 7.61e-05         | 0.00019           |
| rFRtoVmut_H       | 0.749             | 1.03             | 0.973             |
| f_rFRtoVmut_H     | 0.441             | 0.0405           | 0.223             |
| rFRtoVmut_L       | 1.16              | 0.934            | 1.13              |
| f_rFRtoVmut_L     | 0.0187            | 0.115            | 0.0187            |
| HCDR3             | 21.0              | 21.0             | 21.0              |
| fHCDR3            | 0.0298            | 0.0298           | 0.0298            |
| LCDR3             | 10.0              | 10.0             | 10.0              |
| fLCDR3            | 0.217             | 0.217            | 0.217             |
| InsCount_H        | 1                 | 0                | 0                 |
| InsSizes_H        | 18                | 0                | 0                 |
| fInsSizes_H VHmut | 0.00123           | 0.905            | 0.905             |
| DeLCount_H        | 0                 | 0                | 0                 |
| DeLSizes_H        | 0                 | 0                | 0                 |
| fDeLSizes_H VHmut | 0.974             | 0.974            | 0.974             |
| InsCount_L        | 0                 | 0                | 0                 |
| InsSizes_L        | 0                 | 0                | 0                 |
| fInsSizes_L VLmut | 0.954             | 0.954            | 0.954             |
| DeLCount_L        | 1                 | 0                | 0                 |
| DeLSizes_L        | 15                | 0                | 0                 |
| fDeLSizes_L VLmut | 0.000319          | 0.985            | 0.985             |
| CysCount_H        | 4                 | 2                | 2                 |
| fCysCount_H VHmut | 0.103             | 0.746            | 0.746             |
| CysCount_L        | 2                 | 2                | 2                 |
| fCysCount_L VLmut | 0.838             | 0.838            | 0.838             |
| fHL               | 1.01e-25          | 6.58e-20         | 8.4e-19           |

J.

| SeqID             | PGT124_32H3L     |
|-------------------|------------------|
| VDJ               | HV4-59_HD3-3_HJ6 |
| fVDJ              | 0.000844         |
| VJ                | LV3-21_LJ3       |
| fVL VH            | 0.0275           |
| fJL VL            | 0.716            |
| VHmut             | 16.8             |
| fVHmut            | 0.0203           |
| VLmut             | 20               |
| fVLmut            | 0.00019          |
| rFRtoVmut_H       | 0.864            |
| f_rFRtoVmut_H     | 0.223            |
| rFRtoVmut_L       | 0.357            |
| f_rFRtoVmut_L     | 0.184            |
| HCDR3             | 26.0             |
| fHCDR3            | 0.00275          |
| LCDR3             | 12.0             |
| fLCDR3            | 0.114            |
| InsCount_H        | 0                |
| InsSizes_H        | 0                |
| fInsSizes_H VHmut | 0.905            |
| DeLCount_H        | 0                |
| DeLSizes_H        | 0                |
| fDeLSizes_H VHmut | 0.974            |
| InsCount_L        | 1                |
| InsSizes_L        | 9                |
| fInsSizes_L VLmut | 0.000716         |
| DeLCount_L        | 0                |
| DeLSizes_L        | 0                |
| fDeLSizes_L VLmut | 0.985            |
| CysCount_H        | 2                |
| fCysCount_H VHmut | 0.746            |
| CysCount_L        | 2                |
| fCysCount_L VLmut | 0.838            |
| fHL               | 3.21e-19         |

K.

| SeqID             | PGT135            | PGT137            | PGT136            |
|-------------------|-------------------|-------------------|-------------------|
| VDJ               | HV4-39_HD2-21_HJ5 | HV4-39_HD2-15_HJ5 | HV4-39_HD2-15_HJ5 |
| fVDJ              | 0.000435          | 0.000602          | 0.000602          |
| VJ                | KV3-15_KJ1        | KV3-15_KJ1        | KV3-15_KJ1        |
| fVL VH            | 0.0415            | 0.0415            | 0.0415            |
| fJL VL            | 0.335             | 0.335             | 0.335             |
| VHmut             | 29.4              | 32.7              | 29.1              |
| fVHmut            | 2.01e-05          | 1e-05             | 2.01e-05          |
| VLmut             | 29.5              | 19.3              | 21.6              |
| fVLmut            | 1.9e-05           | 0.00097           | 0.00019           |
| rFRtoVmut_H       | 1.05              | 1.06              | 1.06              |
| f_rFRtoVmut_H     | 0.0405            | 0.0405            | 0.0405            |
| rFRtoVmut_L       | 1.02              | 0.977             | 1.14              |
| f_rFRtoVmut_L     | 0.0187            | 0.115             | 0.0187            |
| HCDR3             | 20.0              | 20.0              | 20.0              |
| fHCDR3            | 0.042             | 0.042             | 0.042             |
| LCDR3             | 9.0               | 9.0               | 9.0               |
| fLCDR3            | 0.668             | 0.668             | 0.668             |
| InsCount_H        | 1                 | 1                 | 2                 |
| InsSize_H         | 15                | 15                | 15-3              |
| fInsSize_H VHmut  | 0.00143           | 0.00143           | 0.000101          |
| DelCount_H        | 0                 | 0                 | 0                 |
| DelSize_H         | 0                 | 0                 | 0                 |
| fDelSize_H VHmut  | 0.974             | 0.974             | 0.974             |
| InsCount_L        | 0                 | 0                 | 0                 |
| InsSize_L         | 0                 | 0                 | 0                 |
| fInsSize_L VHmut  | 0.954             | 0.954             | 0.954             |
| DelCount_L        | 0                 | 0                 | 0                 |
| DelSize_L         | 0                 | 0                 | 0                 |
| fDelSize_L VHmut  | 0.985             | 0.985             | 0.985             |
| CysCount_H        | 2                 | 2                 | 2                 |
| fCysCount_H VHmut | 0.746             | 0.746             | 0.746             |
| CysCount_L        | 2                 | 2                 | 2                 |
| fCysCount_L VHmut | 0.838             | 0.838             | 0.838             |
| FHL               | 4.03e-23          | 8.79e-21          | 3.95e-23          |



L.

| SeqID             | 1NC9              | 8ANC131           | 8ANC134           | 1B2530            |
|-------------------|-------------------|-------------------|-------------------|-------------------|
| VDJ               | HV1-46_HD5-12_HJ4 | HV1-46_HD3-16_HJ6 | HV1-46_HD3-16_HJ6 | HV1-46_HD3-10_HJ5 |
| fVDJ              | 0.000532          | 0.000119          | 0.000119          | 0.000264          |
| VJ                | LV1-47_L133       | KV3-NL5_KJ3       | KV3-NL1_KJ3       | LV1-47_L133       |
| fVJ               | 0.0281            | 0.00121           | 0.000302          | 0.0281            |
| fJL VL            | 0.779             | 0.14              | 5.55e-06          | 0.779             |
| VHmut             | 37.5              | 41.1              | 40                | 40.6              |
| fVHmut            | 1e-05             | 1e-05             | 1e-05             | 1e-05             |
| VLmut             | 25                | 26.4              | 27.6              | 22.5              |
| fVLmut            | 1.9e-05           | 1.9e-05           | 1.9e-05           | 7.61e-05          |
| rFRtoVmut_H       | 1.07              | 0.947             | 0.972             | 1.03              |
| f_rFRtoVmut_H     | 0.0405            | 0.223             | 0.223             | 0.0405            |
| rFRtoVmut_L       | 0.679             | 1.28              | 1.23              | 0.924             |
| f_rFRtoVmut_L     | 0.286             | 0.00119           | 0.00119           | 0.115             |
| HCDR3             | 21.0              | 18.0              | 18.0              | 18.0              |
| fHCDR3            | 0.0298            | 0.0661            | 0.0661            | 0.0661            |
| LCDR3             | 11.0              | 9.0               | 9.0               | 11.0              |
| fLCDR3            | 0.483             | 0.668             | 0.668             | 0.483             |
| InsCount_H        | 0                 | 0                 | 0                 | 0                 |
| InsSizes_H        | 0                 | 0                 | 0                 | 0                 |
| fInsSizes_H VHmut | 0.905             | 0.905             | 0.905             | 0.905             |
| DelCount_H        | 0                 | 1                 | 1                 | 0                 |
| DelSizes_H        | 0                 | 3                 | 3                 | 0                 |
| fDelSizes_H VHmut | 0.974             | 0.0183            | 0.0183            | 0.974             |
| InsCount_L        | 0                 | 0                 | 0                 | 0                 |
| InsSizes_L        | 0                 | 0                 | 0                 | 0                 |
| fInsSizes_L VLmut | 0.954             | 0.954             | 0.954             | 0.954             |
| DelCount_L        | 0                 | 1                 | 1                 | 0                 |
| DelSizes_L        | 0                 | 6                 | 3                 | 0                 |
| fDelSizes_L VLmut | 0.985             | 0.00191           | 0.0119            | 0.985             |
| CysCount_H        | 2                 | 2                 | 2                 | 2                 |
| fCysCount_H VHmut | 0.746             | 0.746             | 0.746             | 0.746             |
| CysCount_L        | 2                 | 2                 | 2                 | 2                 |
| fCysCount_L VLmut | 0.838             | 0.838             | 0.838             | 0.838             |
| fHL               | 1.93e-19          | 8.45e-28          | 5.21e-32          | 3.41e-19          |

## M.

|                   |                    |
|-------------------|--------------------|
| SeqID             | VRC16              |
| VDJ               | HV3-23D_HD3-22_HJ4 |
| fVDJ              | 0.00395            |
| VJ                | KV1D-39_KJ1        |
| fVL VH            | 0.0982             |
| fJL VL            | 0.318              |
| VHmut             | 27.1               |
| fVHmut            | 6.02e-05           |
| VLmut             | 28.4               |
| fVLmut            | 1.9e-05            |
| rFRtoVmut_H       | 1.07               |
| f_rFRtoVmut_H     | 0.0405             |
| rFRtoVmut_L       | 1.26               |
| f_rFRtoVmut_L     | 0.00119            |
| HCDR3             | 22.0               |
| fHCDR3            | 0.0209             |
| LCDR3             | 9.0                |
| fLCDR3            | 0.668              |
| InsCount_H        | 0                  |
| InsSizes_H        | 0                  |
| fInsSizes_H VHmut | 0.905              |
| DelCount_H        | 0                  |
| DelSizes_H        | 0                  |
| fDelSizes_H VHmut | 0.974              |
| InsCount_L        | 0                  |
| InsSizes_L        | 0                  |
| fInsSizes_L VLmut | 0.954              |
| DelCount_L        | 0                  |
| DelSizes_L        | 0                  |
| fDelSizes_L VLmut | 0.985              |
| CysCount_H        | 2                  |
| fCysCount_H VHmut | 0.746              |
| CysCount_L        | 2                  |
| fCysCount_L VLmut | 0.838              |
| fHL               | 4.93e-20           |

N.

|                   |                   |
|-------------------|-------------------|
| SeqID             | 8ANC195           |
| VDJ               | HV1-69D_HD3-3_H14 |
| fVDJ              | 0.000726          |
| VJ                | KV1-5_KJ1         |
| fVL VH            | 0.0759            |
| fJL VL            | 0.493             |
| VHmut             | 43.4              |
| fVHmut            | 1e-05             |
| VLmut             | 29.2              |
| fVLmut            | 1.9e-05           |
| rFRtoVmut_H       | 1.13              |
| f_rFRtoVmut_H     | 0.0405            |
| rFRtoVmut_L       | 0.969             |
| f_rFRtoVmut_L     | 0.115             |
| HCDR3             | 22.0              |
| fHCDR3            | 0.0209            |
| LCDR3             | 9.0               |
| fLCDR3            | 0.668             |
| InsCount_H        | 2                 |
| InsSizes_H        | 3-12              |
| fInsSizes_H VHmut | 0.000361          |
| DelCount_H        | 1                 |
| DelSizes_H        | 6                 |
| fDelSizes_H VHmut | 0.00445           |
| InsCount_L        | 1                 |
| InsSizes_L        | 3                 |
| fInsSizes_L VLmut | 0.0325            |
| DelCount_L        | 0                 |
| DelSizes_L        | 0                 |
| fDelSizes_L VLmut | 0.985             |
| CysCount_H        | 2                 |
| fCysCount_H VHmut | 0.746             |
| CysCount_L        | 2                 |
| fCysCount_L VLmut | 0.838             |
| fHL               | 1.09e-26          |

O.

|                   |                   |
|-------------------|-------------------|
| SeqID             | 35022             |
| VDJ               | HV1-18_HD3-18_H15 |
| fVDJ              | 0.000888          |
| VJ                | LV2-23_LJ1        |
| fVL VH            | 0.0292            |
| fJL VL            | 0.425             |
| VHmut             | 33.7              |
| fVHmut            | 1e-05             |
| VLmut             | 38.9              |
| fVLmut            | 1.9e-05           |
| rFRtoVmut_H       | 1.04              |
| f_rFRtoVmut_H     | 0.0405            |
| rFRtoVmut_L       | 1.02              |
| f_rFRtoVmut_L     | 0.0187            |
| HCDR3             | 16.0              |
| fHCDR3            | 0.101             |
| LCDR3             | 10.0              |
| fLCDR3            | 0.217             |
| InsCount_H        | 1                 |
| InsSizes_H        | 24                |
| fInsSizes_H VHmut | 0.000167          |
| DelCount_H        | 0                 |
| DelSizes_H        | 0                 |
| fDelSizes_H VHmut | 0.974             |
| InsCount_L        | 0                 |
| InsSizes_L        | 0                 |
| fInsSizes_L VLmut | 0.954             |
| DelCount_L        | 0                 |
| DelSizes_L        | 0                 |
| fDelSizes_L VLmut | 0.985             |
| CysCount_H        | 2                 |
| fCysCount_H VHmut | 0.746             |
| CysCount_L        | 6                 |
| fCysCount_L VLmut | 6.98e-05          |
| fHL               | 2.77e-28          |

P.

|                   |                   |
|-------------------|-------------------|
| SeqID             | VRC13             |
| VDJ               | HV1-69D_HD3-9_HJ2 |
| fVDJ              | 1.76e-05          |
| VJ                | LV2-14_LJ1        |
| fVL VH            | 0.00307           |
| fJL VL            | 0.772             |
| VHmut             | 47.5              |
| fVHmut            | 1e-05             |
| VLmut             | 26.2              |
| fVLmut            | 1.9e-05           |
| rFRtoVmut_H       | 0.956             |
| f_rFRtoVmut_H     | 0.223             |
| rFRtoVmut_L       | 1.37              |
| f_rFRtoVmut_L     | 0.00119           |
| HCDR3             | 23.0              |
| fHCDR3            | 0.0134            |
| LCDR3             | 6.0               |
| fLCDR3            | 0.00141           |
| InsCount_H        | 1                 |
| InsSizes_H        | 15                |
| fInsSizes_H VHmut | 0.00143           |
| DelCount_H        | 0                 |
| DelSizes_H        | 0                 |
| fDelSizes_H VHmut | 0.974             |
| InsCount_L        | 0                 |
| InsSizes_L        | 0                 |
| fInsSizes_L VLmut | 0.954             |
| DelCount_L        | 1                 |
| DelSizes_L        | 18                |
| fDelSizes_L VLmut | 0.000717          |
| CysCount_H        | 2                 |
| fCysCount_H VHmut | 0.746             |
| CysCount_L        | 2                 |
| fCysCount_L VLmut | 0.838             |
| fHL               | 2.38e-32          |
