# Supplementary material for: Minimally Mutated HIV-1 Broadly Neutralizing Antibodies to Guide Reductionist Vaccine Design
Source: PubMed Central journal article supplement (PMC4999182; doi:10.1371/journal.ppat.1005815), 2016-08-25
Supplement: ppat.1005815.s005.pdf [file ppat.1005815.s005.pdf]

| SeqID             | CR9114-HC        | C05-Homo-sapiens   | FI6-HC           | 2G1-Homo-sapiens   | IF1-Homo-sapiens    | 5J8-Homo-sapiens   |
|-------------------|------------------|--------------------|------------------|--------------------|---------------------|--------------------|
| VDJ               | HV1-69_HD1-1_HJ6 | HV3-23D_HD6-13_HJ3 | HV3-30_HD3-9_HJ4 | HV1-69D_HD1-26_HJ5 | HV3-30-3_HD3-22_HJ5 | HV4-38-2_HD3-3_HJ4 |
| fVDJ              | 7.48e-05         | 0.000572           | 0.000726         | 4.84e-05           | 6.16e-05            | 0.000171           |
| VJ                | LV1-44_LJ7       | KV1D-33_KJ4        | KV4-1_KJ1        | KV1D-33_KJ5        | LV1-44_LJ3          | LV3-21_LJ3         |
| fVJ VH            | 0.0363           | 0.044              | 0.0535           | 0.0719             | 0.0353              | 0.0257             |
| fJL VL            | 0.00879          | 0.336              | 0.298            | 0.131              | 0.707               | 0.716              |
| VHmut             | 17.7             | 23.2               | 7.29             | 13.7               | 5.26                | 10.5               |
| fVHmut            | 0.0203           | 0.000642           | 0.197            | 0.091              | 0.15                | 0.134              |
| VLmut             | 12.5             | 13.6               | 4.35             | 7.95               | 5.62                | 8.05               |
| fVLmut            | 0.0225           | 0.0225             | 0.252            | 0.211              | 0.252               | 0.118              |
| rFRtoVmut_H       | 1.03             | 0.785              | 0.748            | 0.664              | 0.691               | 1.04               |
| f_rFRtoVmut_H     | 0.0405           | 0.441              | 0.32             | 0.441              | 0.32                | 0.0405             |
| rFRtoVmut_L       | 0.453            | 0.969              | 0.868            | 0.949              | 0.336               | 0.704              |
| f_rFRtoVmut_L     | 0.331            | 0.115              | 0.114            | 0.115              | 0.184               | 0.286              |
| HCDR3             | 14.0             | 26.0               | 22.0             | 13.0               | 19.0                | 17.0               |
| fHCDR3            | 0.121            | 0.00275            | 0.0209           | 0.107              | 0.0535              | 0.0783             |
| LCDR3             | 11.0             | 9.0                | 9.0              | 9.0                | 12.0                | 11.0               |
| fLCDR3            | 0.483            | 0.668              | 0.668            | 0.668              | 0.114               | 0.483              |
| InsCount_H        | 0                | 0                  | 0                | 0                  | 0                   | 0                  |
| InsSizes_H        | 0                | 0                  | 0                | 0                  | 0                   | 0                  |
| fInsSizes_H VHmut | 0.905            | 0.905              | 0.934            | 0.905              | 0.934               | 0.905              |
| DelCount_H        | 0                | 0                  | 0                | 0                  | 0                   | 0                  |
| DelSizes_H        | 0                | 0                  | 0                | 0                  | 0                   | 0                  |
| fDelSizes_H VHmut | 0.974            | 0.974              | 0.986            | 0.974              | 0.986               | 0.974              |
| InsCount_L        | 0                | 0                  | 0                | 0                  | 0                   | 0                  |
| InsSizes_L        | 0                | 0                  | 0                | 0                  | 0                   | 0                  |
| fInsSizes_L VLmut | 0.954            | 0.954              | 0.949            | 0.954              | 0.954               | 0.954              |
| DelCount_L        | 0                | 0                  | 1                | 0                  | 0                   | 0                  |
| DelSizes_L        | 0                | 0                  | 6.0              | 0                  | 0                   | 0                  |
| fDelSizes_L VLmut | 0.985            | 0.985              | 0.0024           | 0.985              | 0.985               | 0.985              |
| CysCount_H        | 2                | 2                  | 2                | 2                  | 2                   | 2                  |
| fCysCount_H VHmut | 0.746            | 0.746              | 0.8              | 0.746              | 0.8                 | 0.746              |
| CysCount_L        | 2                | 2                  | 2                | 2                  | 2                   | 2                  |
| fCysCount_L VLmut | 0.838            | 0.838              | 0.886            | 0.838              | 0.838               | 0.838              |
| fHL               | 4.43e-15         | 5.92e-15           | 4.36e-13         | 1.66e-11           | 1.21e-11            | 1.14e-11           |

| SeqID             | CR6261-HC-Patent-W020101 | 0M2-Homo-sapiens   |
|-------------------|--------------------------|--------------------|
| VDJ               | HV1-69D_HD2-2_HJ6        | HV1-69D_HD3-16_HJ4 |
| fVDJ              | 0.000418                 | 0.000369           |
| VJ                | LV1-51_LJ3               | KV3-15_KJ1         |
| fVJ VH            | 0.0341                   | 0.0599             |
| fJL VL            | 0.83                     | 0.335              |
| VHmut             | 13.7                     | 17.9               |
| fVHmut            | 0.091                    | 0.0203             |
| VLmut             | 2.25                     | 7.95               |
| fVLmut            | 0.228                    | 0.211              |
| rFRtoVmut_H       | 1.2                      | 0.711              |
| f_rFRtoVmut_H     | 0.0405                   | 0.441              |
| rFRtoVmut_L       | 0.84                     | 0.237              |
| f_rFRtoVmut_L     | 0.114                    | 0.184              |
| HCDR3             | 14.0                     | 16.0               |
| fHCDR3            | 0.121                    | 0.101              |
| LCDR3             | 12.0                     | 10.0               |
| fLCDR3            | 0.114                    | 0.174              |
| InsCount_H        | 0                        | 0                  |
| InsSizes_H        | 0                        | 0                  |
| fInsSizes_H VHmut | 0.905                    | 0.905              |
| DelCount_H        | 0                        | 0                  |
| DelSizes_H        | 0                        | 0                  |
| fDelSizes_H VHmut | 0.974                    | 0.974              |
| InsCount_L        | 0                        | 0                  |
| InsSizes_L        | 0                        | 0                  |
| fInsSizes_L VLmut | 0.949                    | 0.954              |
| DelCount_L        | 0                        | 0                  |
| DelSizes_L        | 0                        | 0                  |
| fDelSizes_L VLmut | 0.991                    | 0.985              |
| CysCount_H        | 2                        | 2                  |
| fCysCount_H VHmut | 0.746                    | 0.746              |
| CysCount_L        | 2                        | 2                  |
| fCysCount_L VLmut | 0.886                    | 0.838              |
| fHL               | 8.58e-12                 | 2.36e-11           |
