# Supplementary material for: Minimally Mutated HIV-1 Broadly Neutralizing Antibodies to Guide Reductionist Vaccine Design
Source: PubMed Central journal article supplement (PMC4999182; doi:10.1371/journal.ppat.1005815), 2016-08-25

A.

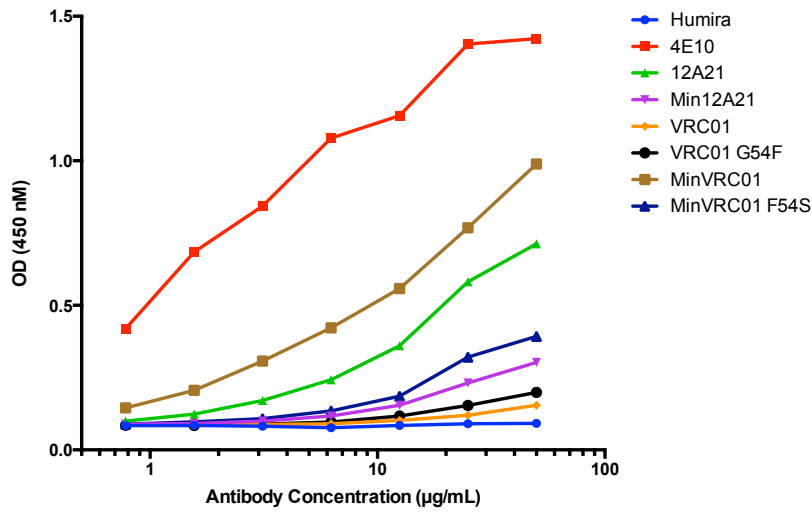

B.

| Antibody           | µg/ml | Autoantigen |          |       |       |       |        |        |       |
|--------------------|-------|-------------|----------|-------|-------|-------|--------|--------|-------|
|                    |       | U1-RNP      | snRNP/Sm | Sm    | SS-A  | SS-B  | Scl-70 | Cenp-B | Jo-1  |
| 12A21              | 50    | 12.41       | 14.85    | 14.98 | 15.13 | 13.22 | 13.31  | 14.16  | 10.43 |
| Min12A21           | 50    | 5.55        | 5.36     | 4.56  | 5.79  | 4.06  | 4.29   | 3.88   | 5.54  |
| VRC01              | 50    | 2.94        | 2.40     | 2.54  | 2.79  | 2.16  | 2.35   | 1.77   | 2.47  |
| MinVRC01           | 50    | 19.54       | 20.62    | 20.50 | 23.84 | 15.14 | 16.12  | 15.20  | 11.15 |
| VRC01 G54F         | 50    | 3.98        | 3.52     | 3.96  | 4.72  | 3.26  | 4.48   | 3.19   | 3.78  |
| MinVRC01 F54S      | 50    | 12.02       | 9.42     | 11.05 | 12.86 | 8.44  | 11.00  | 9.09   | 8.89  |
| 10E8               | 50    | 4.10        | 3.52     | 4.89  | 6.13  | 3.49  | 5.25   | 3.74   | 5.65  |
| Humira             | 50    | 1.69        | 2.41     | 2.24  | 1.54  | 2.44  | 2.58   | 3.46   | 2.44  |
| Cut-off Calibrator |       | 4.08        | 4.14     | 4.29  | 4.04  | 3.34  | 3.60   | 3.14   | 3.15  |
| Negative Control   |       | 1.21        | 1.22     | 1.23  | 1.33  | 1.29  | 1.32   | 1.27   | 1.20  |

C.

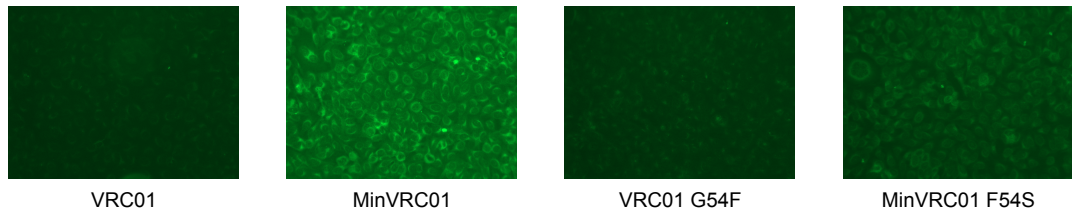

D.

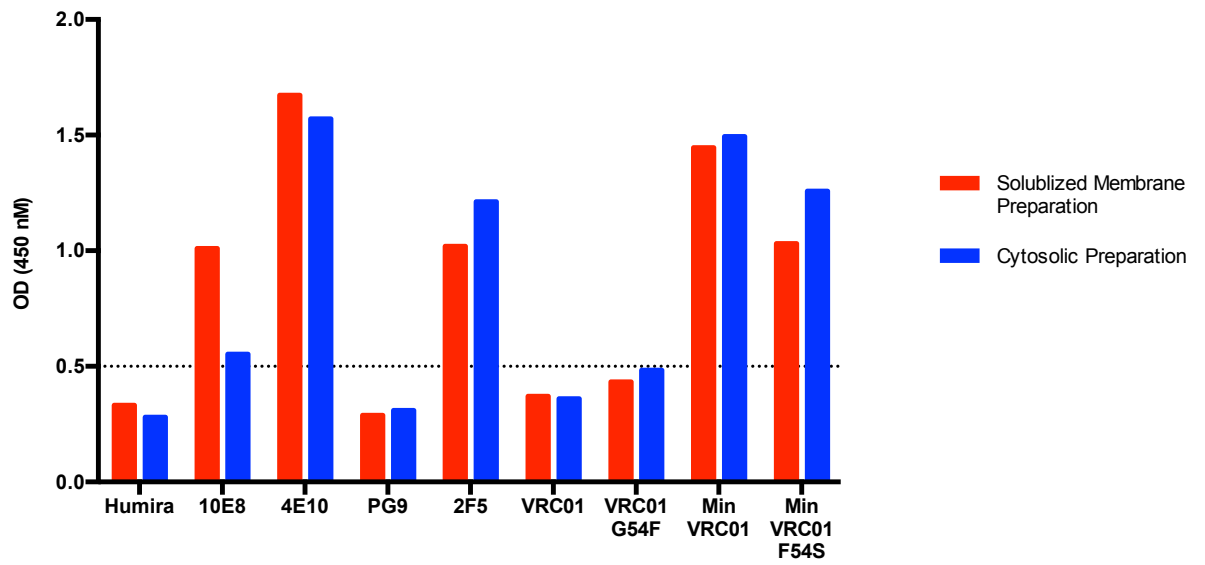

Supplement: ppat.1005815.s006.pdf [file ppat.1005815.s006.pdf]
