# Supplementary material for: Minimally Mutated HIV-1 Broadly Neutralizing Antibodies to Guide Reductionist Vaccine Design
Source: PubMed Central journal article supplement (PMC4999182; doi:10.1371/journal.ppat.1005815), 2016-08-25
Supplement: ppat.1005815.s007.pdf [file ppat.1005815.s007.pdf]

A.

|                    | FR1                                     | CDR1                                            | FR2                               | CDR2 |
|--------------------|-----------------------------------------|-------------------------------------------------|-----------------------------------|------|
| <b>IGHV1-02*02</b> | <b>QVQLVQSGAEVKKPGASVKVSK-ASGYTFTGY</b> | <b>-----YMHWVRQAPGQGLEWMGWINPNSGGTNY-AQKFQG</b> |                                   |      |
| MinVRC01           | .....C                                  | TLN                                             | .....K.RF.AV...R...               |      |
| Min12A21           | .....R.....N                            | IL.W                                            | .....K.VF.AV...RQ...              |      |
| 5fH                | .....E.IDC                              | TLN                                             | .....LK.RG.AV...RPL...            |      |
| 12A12              | SQH...TQ.....RI..Q.....S..D             | VL.W                                            | .....K.VY.AR...RR...              |      |
| 12A21              | SQH...TQ.....R...Q.....N                | IL.W                                            | .....L.K.VF.AV...RQ...            |      |
| 3BNC117            | ...L...A.T...R...E...NIRD               | FI.W                                            | .....Q.V...KT.QP.N-PRQ...         |      |
| 3BNC60             | ..H.S...A.T...R...E...KISDH             | FI.W                                            | .....Q.V...KT.QP.N-PRQ...         |      |
| NIH45-46           | ..R.S...GQM...E.MRL..R...E.LNC          | PIN.I                                           | ...L...RRP...LK.RG.AV...R...      |      |
| PGV04              | .....SG.....R...WTSEDIFERTE             | LI                                              | .....I..VKTVT.AV.FGSPD.RQ         |      |
| PGV19              | E.R.....R...A.....DF                    | DI.L                                            | .....R...VR.LG.VS...RQ...         |      |
| PGV20              | ..H.M...T.M...R.T.Q-T...SD              | FI.L                                            | ..V..R.F...M..QW.QV...RT...       |      |
| VRC-CH30           | .....A.R.....T...F.EDDDYSPHWVNPAPAH     | FI.FL                                           | .....Q...LA.M..TN.AV...WQLH.      |      |
| VRC-CH31           | .....A.R.....T...F.EDDDYSP.WVNPAPAH     | FI.FL                                           | .....Q...LA.M..TN.AV...WYLN.      |      |
| VRC01              | .....GQM...E.MRI..R...E.IDC             | TLN.I                                           | ...L...KRP...LK.RG.AV...RPL...    |      |
| VRC03              | .....VI.T.S...I..R...N.RD               | SI                                              | ...LI.DK.F..I...K.LW.AVS...RQL... |      |
| VRC06              | E...E..PVMR...S.M.I..A-T...N.RDF        | SI                                              | ...FNRRY.F..I...K.MW.AV...RQL...  |      |
| VRC23              | ..F.....R...E...S..D                    | VLQ.I                                           | .....RP...K.ER.AVS...PQ...        |      |

|                    | FR3                                            | CDR3                                        | FR4                    |
|--------------------|------------------------------------------------|---------------------------------------------|------------------------|
| <b>IGHV1-02*02</b> | <b>RVTMTR---DTSIS---TAYMELSLRLSDDTAVYYCAR</b>  |                                             |                        |
| MinVRC01           | .....VYSD                                      | GKNCDYN                                     | ---WDFQHWGQGLTVTVSS    |
| Min12A21           | .....IYRE---I                                  | DESGD-D                                     | ---LKWHLHPWGQGTQIVVSP  |
| 5fH                | .....VYS                                       | GKNCDYN                                     | ---WDFQHWGQGLTVTVSS    |
| 12A12              | .INFD.---IYRE---I.F.D..G.....L.F..D            | DGSGD-D                                     | ---TSWHLDPWGQGLTVVISA  |
| 12A21              | .IQL..---IYRE---I.FLD..G.....                  | DESGD-D                                     | ---LKWHLHPWGQGTQIVVSP  |
| 3BNC117            | ..SL..HASW.FDTF---SF..D.KA.....F..QRSDY        | ---                                         | ---WDFDVWGSQTQTVVSS    |
| 3BNC60             | ..SL..QASW.FDTY---SF..D.KAV.....I.F..QRSDF     | ---                                         | ---WDFDVWGSQTQTVVSS    |
| NIH45-46           | .....VYSD                                      | FL.RS.T.....F.T.GKYCTARDYNNWDFEHWGRGAPTVVSS |                        |
| PGV04              | ..SL..---RDLF---.H.DIRG.TQG...T.F...QKFYTG     | ---QGWYFDLWGRGTLIVVSS                       |                        |
| PGV19              | .....FY.D---.F.DFRN.KM...L.F..MGAAR            | ---                                         | ---EWDFQYWGQGTQTVVSS   |
| PGV20              | .....VYRE---V..LD.RS.TFA...F...RMRSQ-D         | ---                                         | ---REWDFQHWGQGTQTVVSS  |
| VRC-CH30           | .L.A.---G.MT---.FL.VRS.....AQKRGR              | ---                                         | ---SEWAYAHWGQGTQTVVSS  |
| VRC-CH31           | ...A.---R.MT---.FL.VKS.....AQKRGR              | ---                                         | ---SEWAYAHWGQGTQTVVSS  |
| VRC01              | .....VYSD                                      | FL.RS.TV.....F.T.GKNCD                      | ---YNWDFEHWGRGTPVIVSS  |
| VRC03              | ..S...QLSQ.PDDPDWGV...F.G.TPA...E.F.V.RGSCDYC  | ---                                         | ---GDFPWQYWGQGTQTVVSS  |
| VRC06              | ..S.S.LFSQ.LYYPDRG...L.F.G.T.A...D.F.V.RGSSCPH | ---                                         | ---CGDFHFEHWGQGTAVVSSA |
| VRC23              | .L.L.---LYTE---.HFKN.....I.....GVRRA           | ---                                         | ---SWWLQFWGQGLTVTVSS   |

B.

```
-----FR1----- CDR1 -----FR2----- CDR2_
IGKV1-33*01 DIQMTQSPSSLSASVGRVTITTCQASQDISNY-LNWIYQOKPGKAPKLLIYDASNLET
12A12 .....G.G.GSS-.Q.....VHG...HR
12A21 .....N...G.G.GSS-...K...R...VHG...QR
Min12A21 .....G.G.GSS-.....
3BNC60 .....R...T.....N---G-.....RR.....G.K..R
3BNC117 .....T.....---NG-.....RR.....G.K..R
VRC-CH30 .....L.....RG.GKD-.....VS...I..G
VRC-CH31 .....L.....RG.GKD-.....A.....VS...T..G
IGKV3-11*01 EIVLTQSPATLSLSPGERATLSCRASQSVSSY-LAWYQOKPGQAPRLLIYDASNRAT
6fL .....T..YG.----.....V..SG.T..A
NIH45-46 .....T.II..T..G.----.....R.....V..SG.T..A
VRC01 .....G.....T.II..T..YG.----.....R.....V..SG.T..A
MinVRC01 .....T..YG.----.....G.....
IGKV3-15*01 EIVMTQSPATLSVSPGERATLSCRASQSVSSN-LAWYQOKPGQAPRLLIYGASTRAT
VRC23 .....V.V...R.GT.....G.G.D-V...H...T.....S
IGKV3-20*01 EIVLTQSPGTLSPGERATLSCRASQSVSSYLAWIYQOKPGQAPRLLIYGASSRAT
PGV04 .....T.S...T.ASYGH---MT...K...P.K...FAT.K..S
VRC03 .....I.....T...F.K...GGNA---MT...KRR..V.....DT.R..S
VRC06 .....A.....T.....GGN---N...KRR..T.....DT.R..S
IGLV2-14*01 QSALTQ-PASVSGSPGQSITISCTGTSSDVGGYNYVSWYQHPGKAPKLMIEVSNR
PGV19 .....-.....A...FR.FSS.....V..R...L.FS.NR.
PGV20 .....-P.....L...A.T-----S.A...YAD...R.IVFDGNK.
```

```
-----FR3----- CDR3-----FR4-----
IGKV1-33*01 GVPSRFSGSGGTDFITISLQPEDIAITYCQYDNL
12A12 .....FH.T.SL...G..RD.F...F.AVLEFFGPGTKVEIK
12A21 .....FH.T..L.....D.V...F.AVFQWFGPGTKVDIK
Min12A21 .....FH.T.....AVFQWFGPGTKVDIK
3BNC60 ...A...RRW.QEYNL..NN.....V...F..V.EFIVPGTRLDLK
3BNC117 .....RRW.QEYNL..NN.....F..V.EFVVPGTRLDLK
VRC-CH30 .....FHQN.SL.....V...F...ETFGQGTKVDIK
VRC-CH31 .....FHQN.SL.....A..V...F...ETFGQGTKVDIK
IGKV3-11*01 GIPARFSGSGGTDFITLISLEPEDFAVYYCQQRSNWP
6fL .....R..P.Y.....YEFFGPGTKVQVDIK
NIH45-46 ...D...RW.A.YN.S..N..SG..G.....YEFFGQGTKVQVDIK
VRC01 ...D...RW.P.YN...N..SG..G.....YEFFGQGTKVQVDIK
MinVRC01 .....RW.P.....YEFFGQGTKLEIK
IGKV3-15*01 GIPARFSGSGGTEFTLISLQSEDFAVYYCQYNNWP
VRC23 .V.E.....FHVD...S..G..P..V.I.....ETFGQGTKVEIK
IGKV3-20*01 GIPDRFSGSGGTDFITLISRLEPEDFAVYYCQYGS
PGV04 .....QF.KOY...T.M.....R...LEFFGQGTRLEIR
VRC03 .V...V.....F...NK.DR.....FEFFGLGSELEVH
VRC06 D..EK.V.....S...TKVG.....FEFFGLGTTLEIN
IGLV2-14*01 PSGVSNRFSKSGNTASLTISGLQAEDEADYCSSTL
PGV19 ...I.H.....I.....H.NA.EFFGGTKVFLVQ
PGV20 ..DI.S...Q..G.....S...Y.H.NA.FEFFGGTKLTVLSQ
```
