# Supplementary material for: Minimally Mutated HIV-1 Broadly Neutralizing Antibodies to Guide Reductionist Vaccine Design
Source: PubMed Central journal article supplement (PMC4999182; doi:10.1371/journal.ppat.1005815), 2016-08-25

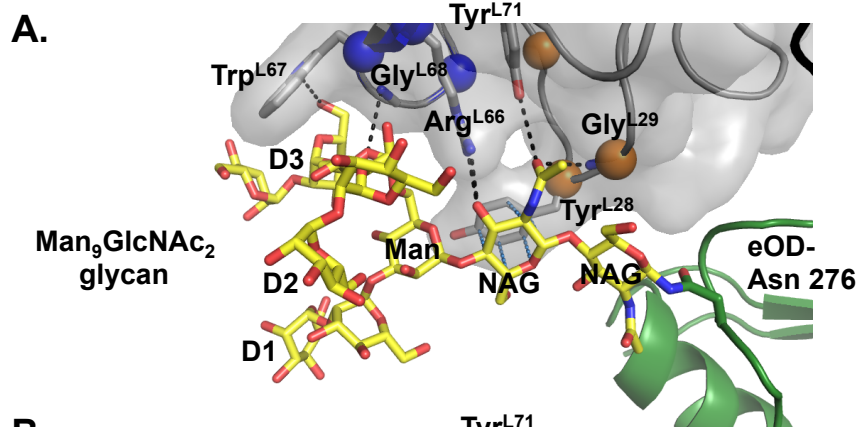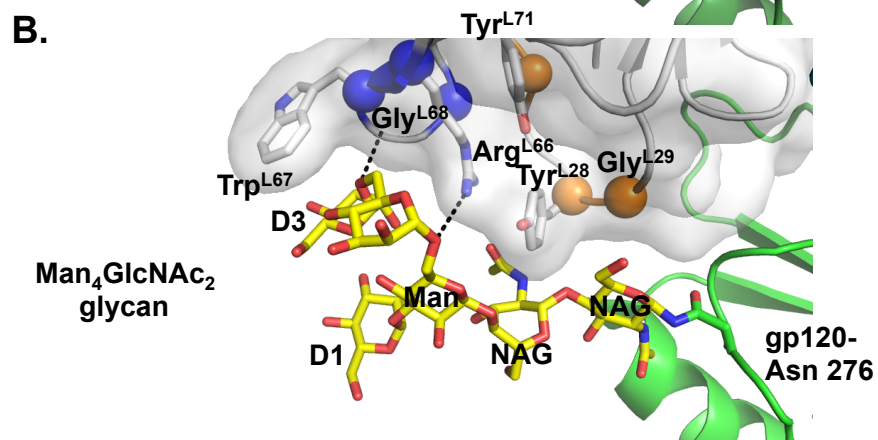

Supplement: ppat.1005815.s008.pdf [file ppat.1005815.s008.pdf]
