# Supplementary material for: Minimally Mutated HIV-1 Broadly Neutralizing Antibodies to Guide Reductionist Vaccine Design
Source: PubMed Central journal article supplement (PMC4999182; doi:10.1371/journal.ppat.1005815), 2016-08-25

**A.**

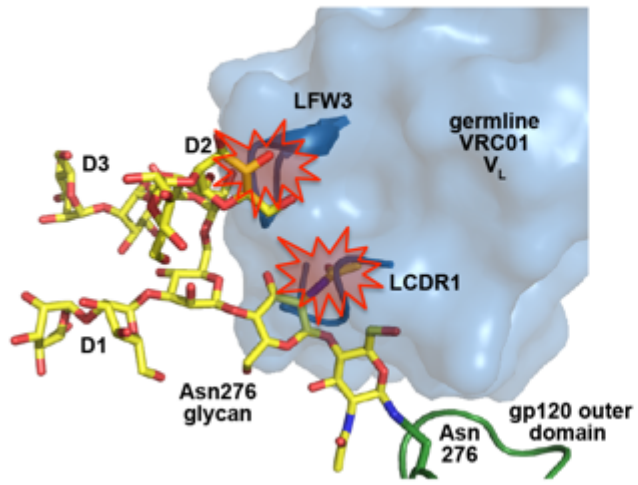

**B.**

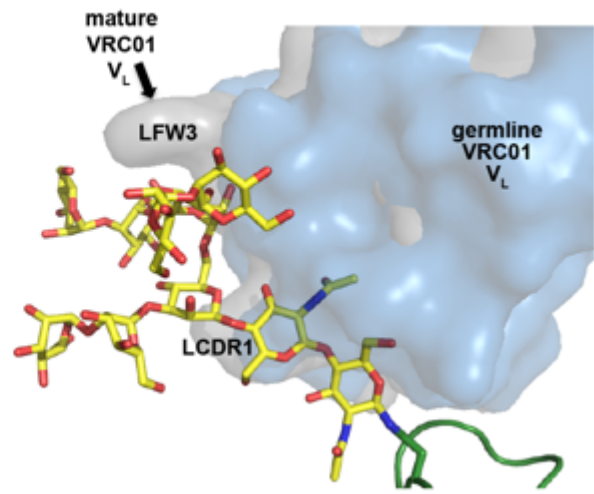

C.

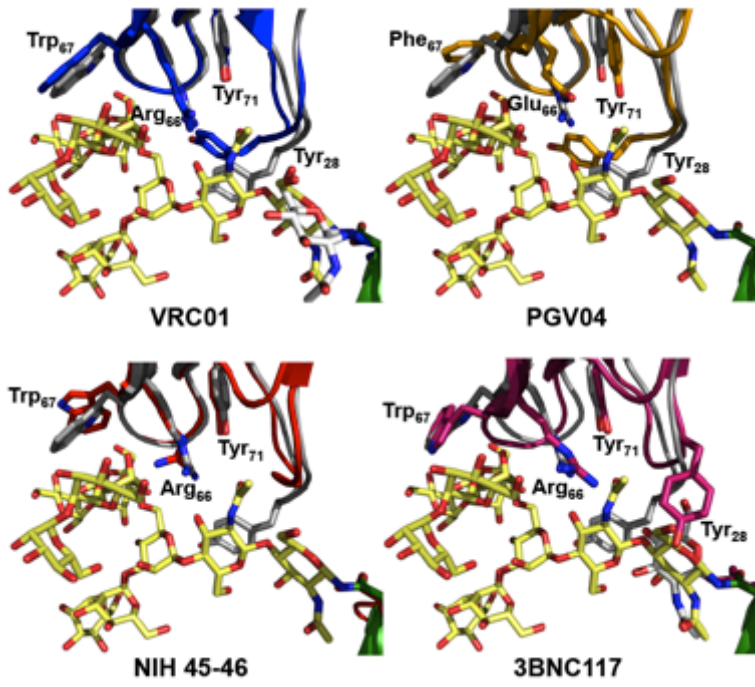

D.

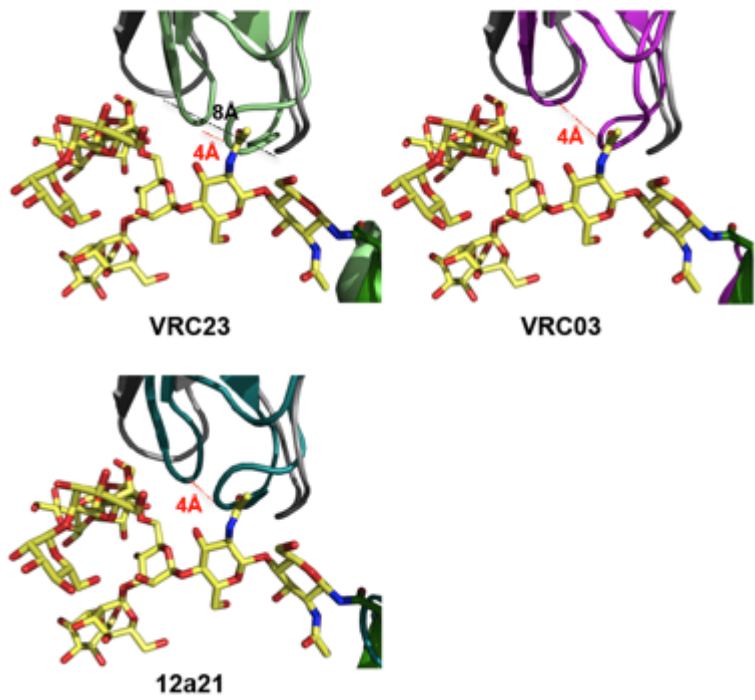

Supplement: ppat.1005815.s009.pdf [file ppat.1005815.s009.pdf]
