# Supplementary material for: Minimally Mutated HIV-1 Broadly Neutralizing Antibodies to Guide Reductionist Vaccine Design
Source: PubMed Central journal article supplement (PMC4999182; doi:10.1371/journal.ppat.1005815), 2016-08-25
Supplement: ppat.1005815.s011.pdf [file ppat.1005815.s011.pdf]

**Table S1. Minimally mutated variants of VRC01 (MinVRC01) and 12A21 (Min12A21) show high retention of neutralization breadth and potency compared to affinity-mature antibodies.** VRC01, MinVRC01, 12A21, and Min12A21 were tested on a cross-clade 80-virus panel. Presented values are neutralization IC<sub>50</sub> in µg/ml and colored according to the listed legend.

| VIRUS              | CLADE   | VRC01 | MinVRC01 | 12A21 | Min12A21 | Neutralization<br>IC <sub>50</sub> (µg/mL) |
|--------------------|---------|-------|----------|-------|----------|--------------------------------------------|
| Q23.17             | A       | 0.083 | 0.128    | 0.036 | 0.105    | 50                                         |
| Q461.e2            | A       | 0.425 | 0.642    | 0.077 | 0.267    | 10.0                                       |
| Q769.d22           | A       | 0.052 | 0.015    | 0.021 | 0.060    | 1.00                                       |
| 0330.v4.c3         | A       | 0.069 | 0.089    | 0.023 | 0.054    | 0.100                                      |
| 0260.v5.c36        | A       | 0.252 | 0.319    | 0.141 | 0.480    | 0.010                                      |
| 191084 B7-19       | A       | 0.054 | 0.030    | 0.033 | 4.049    | 0.001                                      |
| QH0692.42          | B       | 1.46  | 1.33     | 0.799 | 1.857    |                                            |
| SC422661.8         | B       | 0.097 | 0.014    | 0.338 | > 50     |                                            |
| PVO.4              | B       | 0.648 | 0.328    | 0.262 | 0.886    |                                            |
| TRO.11             | B       | 0.329 | 0.332    | 0.070 | 0.203    |                                            |
| AC10.0.29          | B       | 1.98  | 1.45     | 0.710 | 4.51     |                                            |
| RHPA4259.7         | B       | 0.043 | 0.016    | 0.005 | > 50     |                                            |
| REJO4541.67        | B       | 0.034 | 0.020    | 0.097 | > 50     |                                            |
| WITO4160.33        | B       | 0.129 | 0.516    | 0.025 | 0.280    |                                            |
| CAAN5342.A2        | B       | 2.42  | 0.750    | 0.083 | 1.24     |                                            |
| WEAU_d15_410_5017  | B (T/F) | 0.125 | 0.012    | 0.269 | > 50     |                                            |
| 1006_11_C3_1601    | B (T/F) | 0.189 | 3.43     | 0.010 | 2.76     |                                            |
| 1054_07_TC4_1499   | B (T/F) | 0.001 | 0.934    | 0.049 | 0.256    |                                            |
| 1056_10_TA11_1826  | B (T/F) | 1.71  | 0.764    | 0.466 | > 50     |                                            |
| 6240_08_TA5_4622   | B (T/F) | 1.54  | 1.57     | 0.034 | > 50     |                                            |
| 6244_13_B5_4576    | B (T/F) | 0.160 | 0.055    | 0.480 | 0.987    |                                            |
| 62357_14_D3_4589   | B (T/F) | 0.475 | 0.169    | 0.070 | 0.267    |                                            |
| SC05_8C11_2344     | B (T/F) | 0.543 | 0.253    | 0.120 | 0.778    |                                            |
| Du156.12           | C       | 0.105 | 0.012    | 0.011 | 2.24     |                                            |
| Du422.1            | C       | >50   | >50      | 0.665 | > 50     |                                            |
| ZM214M.PL15        | C       | 0.748 | 0.686    | 0.049 | 0.197    |                                            |
| ZM249M.PL1         | C       | 0.041 | 0.025    | 0.028 | > 50     |                                            |
| ZM53M.PB12         | C       | 1.07  | 0.780    | 0.131 | 0.447    |                                            |
| ZM109F.PB4         | C       | 0.084 | 0.044    | 0.094 | > 50     |                                            |
| CAP45.2.00.G3      | C       | 1.20  | >50      | 0.026 | > 50     |                                            |
| CAP210.2.00.E8     | C       | >50   | >50      | > 50  | > 50     |                                            |
| HIV-001428-2.42    | C       | 0.017 | 0.002    | 0.010 | 2.22     |                                            |
| HIV-16055-2.3      | C       | 0.051 | 0.030    | 0.014 | 0.071    |                                            |
| HIV-16845-2.22     | C       | 3.08  | 1.11     | 2.99  | > 50     |                                            |
| Ce1176_A3          | C (T/F) | 1.06  | 0.750    | 0.211 | 0.739    |                                            |
| Ce2010_F5          | C (T/F) | 0.231 | 0.101    | 0.061 | 0.184    |                                            |
| Ce2060_G9          | C (T/F) | 0.230 | 0.123    | 0.053 | 0.163    |                                            |
| Ce703010054_2A2    | C (T/F) | 0.431 | 0.292    | 0.170 | > 50     |                                            |
| 246F C1G           | C (T/F) | 1.55  | >50      | 0.059 | > 50     |                                            |
| 249M B10           | C (T/F) | 0.079 | 0.024    | 0.053 | 0.178    |                                            |
| ZM247v1(Rev-)      | C (T/F) | 0.279 | >50      | 0.022 | > 50     |                                            |
| 7030102001E5(Rev-) | C (T/F) | 0.541 | 0.098    | 0.008 | 3.69     |                                            |
| 1394C9G1(Rev-)     | C (T/F) | 0.329 | 0.811    | 0.008 | 0.019    |                                            |
| Ce704809221_1B3    | C (T/F) | 0.464 | 0.073    | 0.047 | 0.119    |                                            |
| X2131_C1_B5        | G       | 0.477 | 0.263    | 0.925 | > 50     |                                            |
| P1981_C5_3         | G       | 0.189 | 0.091    | 0.086 | 3.10     |                                            |
| X1632_S2_B10       | G       | 0.055 | 0.022    | 0.109 | > 50     |                                            |
| 3016.v5.c45        | D       | 0.066 | 0.460    | 0.010 | 0.099    |                                            |
| 231965.c01         | D       | 0.133 | 0.042    | > 50  | > 50     |                                            |

**Table S1 (Continued)**

| VIRUS           | CLADE          | VRC01 | MinVRC01 | 12A21 | Min12A21 | Neutralization IC <sub>50</sub> (µg/mL) |
|-----------------|----------------|-------|----------|-------|----------|-----------------------------------------|
| 3301.v1.c24     | AC             | 0.080 | 0.019    | 0.011 | > 50     | 50                                      |
| 6041.v3.c23     | AC             | 0.009 | 0.250    | 0.002 | 0.007    | 10.0                                    |
| 6540.v4.c1      | AC             | >50   | >50      | 0.022 | 1.10     | 1.00                                    |
| 6545.v4.c1      | AC             | >50   | >50      | > 50  | > 50     | 0.100                                   |
| CNE19           | BC             | 0.191 | 0.026    | 0.023 | > 50     | 0.010                                   |
| CNE21           | BC             | 0.398 | 3.78     | 0.027 | 1.30     | 0.001                                   |
| CNE17           | BC             | 1.42  | 0.543    | 2.379 | > 50     |                                         |
| CNE30           | BC             | 0.827 | 0.915    | 0.170 | 0.438    |                                         |
| CNE52           | BC             | 0.084 | 0.022    | 0.026 | 0.120    |                                         |
| CNE53           | BC             | 0.121 | 0.024    | 0.028 | 0.047    |                                         |
| CNE58           | BC             | 0.186 | 0.634    | 0.032 | 50       |                                         |
| 6480.v4.c25     | CD             | 0.030 | 0.040    | 0.023 | 0.069    |                                         |
| 6952.v1.c20     | CD             | 0.031 | 0.047    | > 50  | > 50     |                                         |
| 6811.v7.c18     | CD             | 0.122 | 0.039    | 0.035 | 0.169    |                                         |
| 89-F1_2_25      | CD             | >50   | >50      | > 50  | > 50     |                                         |
| 0815.v3.c3      | ACD            | 0.012 | 0.005    | 0.013 | 0.044    |                                         |
| T257-31         | CRF02_AG       | 0.706 | 0.599    | 0.041 | 0.034    |                                         |
| 928-28          | CRF02_AG       | 0.173 | 0.103    | 0.161 | 0.476    |                                         |
| T250-4          | CRF02_AG       | >50   | >50      | > 50  | > 50     |                                         |
| T251-18         | CRF02_AG       | 1.97  | 1.17     | 1.03  | > 50     |                                         |
| T278-50         | CRF02_AG       | >50   | >50      | > 50  | > 50     |                                         |
| T255-34         | CRF02_AG       | 0.260 | 0.303    | 0.048 | 0.132    |                                         |
| 211-9           | CRF02_AG       | 11.0  | >50      | 0.048 | 7.44     |                                         |
| C1080.c03       | CRF01_AE       | 1.48  | >50      | 0.036 | 0.120    |                                         |
| R2184.c04       | CRF01_AE       | 0.061 | 0.038    | 0.034 | 1.49     |                                         |
| R3265.c06       | CRF01_AE       | 0.326 | 1.09     | 0.084 | 0.180    |                                         |
| C3347.c11       | CRF01_AE       | 0.069 | 0.015    | 0.010 | 0.021    |                                         |
| BJOX009000.02.4 | CRF01_AE       | 1.34  | 1.89     | > 50  | > 50     |                                         |
| BJOX015000.11.5 | CRF01_AE (T/F) | 0.081 | 0.566    | 0.199 | 0.870    |                                         |
| BJOX025000.01.1 | CRF01_AE (T/F) | 0.601 | 1.06     | 0.051 | 0.144    |                                         |
| BJOX028000.10.3 | CRF01_AE (T/F) | >50   | >50      | 0.042 | 0.017    |                                         |
