# Supplementary material for: Minimally Mutated HIV-1 Broadly Neutralizing Antibodies to Guide Reductionist Vaccine Design
Source: PubMed Central journal article supplement (PMC4999182; doi:10.1371/journal.ppat.1005815), 2016-08-25
Supplement: ppat.1005815.s012.pdf [file ppat.1005815.s012.pdf]

**Table S2. Reversion of affinity maturation patches on VRC01 and MinVRC01 reveal redundancies in affinity maturation residues that contribute to neutralization.** Variants in which affinity maturation patches on VRC01 and MinVRC01 were reverted to germline were tested on a cross-clade panel of viruses. While there was loss of neutralization breadth for L-FW3 and H-CDR2 reversions for MinVRC01, neutralization activity remained for VRC01. The data also show that the disulfide is not necessary for potency and breadth of MinVRC01. Presented values are neutralization IC<sub>50</sub> in µg/ml and colored according to the listed legend.

| CLADE    | VIRUS            | VRC01 | VRC01<br>LACDR1 | VRC01<br>LΔFW3 | VRC01<br>HΔCDR1 | VRC01<br>HΔCDR2 | VRC01<br>HΔFW3 | VRC01<br>HΔdisulf | Neutralization<br>IC <sub>50</sub> (µg/mL) |
|----------|------------------|-------|-----------------|----------------|-----------------|-----------------|----------------|-------------------|--------------------------------------------|
| A        | Q769             | 0.02  | 0.06            | 0.05           | 0.03            | 3.13            | 0.06           | 0.029             | 50                                         |
|          | 0330.v4.c3       | 0.11  | > 50            | 2.51           | 1.43            | 8.50            | 0.29           | 0.076             | 10                                         |
|          | Q461.e2          | 0.26  | > 50            | > 50           | 50              | 12.9            | 0.77           | 0.239             | 1                                          |
| B        | REJO4541.67      | 0.05  | 0.11            | 0.08           | 0.07            | 1.35            | 0.07           | 0.036             | 0.10                                       |
|          | JR-FL            | 0.03  | > 50            | 0.24           | > 50            | > 50            | 0.10           | 0.033             | 0.01                                       |
|          | TRO.11           | 0.33  | > 50            | > 50           | 50              | > 50            | 0.78           | 0.300             | 0.001                                      |
| C        | ZM197M.PB7       | 0.10  | 0.19            | 0.12           | 0.19            | 0.30            | 0.14           | 0.059             |                                            |
|          | 6240_08_TA5_4622 | 0.61  | > 50            | 1.37           | 0.62            | 10.6            | 1.23           | 0.495             |                                            |
|          | ZM109F.PF4       | 0.18  | > 50            | 4.53           | 2.33            | 2.08            | 0.36           | 0.194             |                                            |
| C (T/F)  | Ce2010_F5        | 0.28  | > 50            | 0.83           | 0.33            | 3.47            | 0.53           | 0.166             |                                            |
|          | Ce2060_G9        | 0.23  | > 50            | > 50           | > 50            | > 50            | 0.83           | 0.262             |                                            |
| BC       | CNE52            | 0.34  | > 50            | 2.00           | 0.83            | 3.17            | 1.30           | 0.206             |                                            |
|          | CNE30            | 0.50  | > 50            | > 50           | 2.47            | > 50            | 1.17           | 0.433             |                                            |
| CRF02_AG | C3347.c11        | 0.08  | 0.07            | 0.12           | 3.26            | > 50            | 0.16           | 0.073             |                                            |
|          | R2184.c04        | 0.09  | 0.37            | 0.10           | 0.35            | 0.28            | 0.20           | 0.061             |                                            |
| G        | X2131            | 0.29  | 20              | 0.69           | 2.40            | 1.99            | 1.43           | 0.467             |                                            |

  

| CLADE    | VIRUS            | MinVRC01 | MinVRC01<br>LACDR1 | MinVRC01<br>LΔFW3 | MinVRC01<br>HΔCDR1 | MinVRC01<br>HΔCDR2 | MinVRC01<br>HΔFW3 | MinVRC01<br>HΔdisulf |
|----------|------------------|----------|--------------------|-------------------|--------------------|--------------------|-------------------|----------------------|
| A        | Q769             | 0.02     | 11.0               | > 10              | 0.41               | > 50               | 0.03              | 0.031                |
|          | 0330.v4.c3       | 0.17     | > 50               | > 50              | > 50               | > 50               | 4.76              | 0.510                |
|          | Q461.e2          | 0.28     | > 50               | > 50              | > 50               | > 50               | 5.89              | 0.522                |
| B        | REJO4541.67      | 0.01     | > 50               | > 10              | > 50               | > 50               | 0.03              | 0.025                |
|          | JR-FL            | 1.19     | > 50               | > 50              | > 50               | > 50               | > 50              | 3.030                |
|          | TRO.11           | 0.44     | > 50               | > 50              | > 50               | > 50               | 5.07              | 1.551                |
| C        | ZM197M.PB7       | 0.03     | > 50               | 0.17              | 8.90               | > 50               | 0.06              | 0.066                |
|          | 6240_08_TA5_4622 | 0.92     | > 50               | > 50              | > 50               | > 50               | 6.96              | 1.061                |
|          | ZM109F.PF4       | 0.52     | > 50               | > 50              | > 50               | > 50               | 11.4              | 0.418                |
| C (T/F)  | Ce2010_F5        | 0.15     | > 50               | > 50              | 1.81               | > 50               | 1.39              | 0.153                |
|          | Ce2060_G9        | 0.09     | > 50               | > 50              | > 50               | > 50               | 0.69              | 0.153                |
| BC       | CNE52            | 0.09     | > 50               | > 10              | 0.72               | > 50               | 1.79              | 0.141                |
|          | CNE30            | 0.40     | > 50               | > 50              | > 50               | > 50               | 4.92              | 0.936                |
| CRF02_AG | C3347.c11        | 0.02     | 0.02               | 0.17              | 0.25               | > 50               | 0.03              | 0.055                |
|          | R2184.c04        | 0.04     | > 50               | > 10              | 3.09               | > 50               | 0.14              | 0.071                |
| G        | X2131            | 0.18     | > 50               | > 50              | > 50               | > 50               | 2.44              | 0.145                |
