# Supplementary material for: Minimally Mutated HIV-1 Broadly Neutralizing Antibodies to Guide Reductionist Vaccine Design
Source: PubMed Central journal article supplement (PMC4999182; doi:10.1371/journal.ppat.1005815), 2016-08-25
Supplement: ppat.1005815.s013.pdf [file ppat.1005815.s013.pdf]

**Table S3. Buried Surface Area (BSA) on gp120 calculated from different co-crystal structures with VRC01-class bnAbs.** gp120-CD4, PDB ID: 1GC1 ; gp120-VRC01, PDB ID: 3NGB; gp120-NIH45-46, PDB ID: 4JKP. BSA was calculated using 'Protein interfaces, surfaces and assemblies' service PISA at the European Bioinformatics Institute. ([http://www.ebi.ac.uk/pdbe/prot\\_int/pistart.html](http://www.ebi.ac.uk/pdbe/prot_int/pistart.html)) (90). Areas shaded in blue correspond to elements present in eOD.

|                                          | gp120 - CD4 |                    | gp120 - VRC01 |                    | eOD-N276 - VRC01 |                    | gp120- NIH45-46 |                    | BG505 SOSIP - NIH45-46 protomer1 |                    | BG505 SOSIP - NIH45-46 protomer2 |                    |               |
|------------------------------------------|-------------|--------------------|---------------|--------------------|------------------|--------------------|-----------------|--------------------|----------------------------------|--------------------|----------------------------------|--------------------|---------------|
|                                          | Residue     | BSA Å <sup>2</sup> | Residue       | BSA Å <sup>2</sup> | Residue          | BSA Å <sup>2</sup> | Residue         | BSA Å <sup>2</sup> | Residue                          | BSA Å <sup>2</sup> | Residue                          | BSA Å <sup>2</sup> |               |
| <b>α1</b>                                |             |                    | D49           |                    |                  |                    | D49             |                    | E49                              | 13.5               | E49                              |                    | <b>α1</b>     |
|                                          |             |                    | E64           |                    |                  |                    | E64             |                    | E64                              |                    | E64                              | 17.5               |               |
|                                          |             |                    | V65           |                    |                  |                    | C65             |                    | K65                              |                    | K65                              | 13.6               |               |
|                                          |             |                    | H66           |                    |                  |                    | H66             |                    | H66                              |                    | H66                              | 30.6               |               |
|                                          | W96         |                    | W96           |                    |                  |                    | W96             |                    | W96                              | 7.3                | W96                              |                    |               |
| <b>α1</b>                                | K97         |                    | K97           | 27.0               |                  |                    | K97             | 56.2               | K97                              | 49.0               | K97                              |                    | <b>α1</b>     |
|                                          | D99         |                    | N99           |                    |                  |                    | N99             | 18.4               | N99                              | 16.8               | N99                              |                    |               |
|                                          | E102        |                    | E102          |                    |                  |                    | E102            | 39.4               | E102                             | 36.6               | E102                             |                    |               |
| <b>β2</b>                                | L22         |                    | L122          |                    |                  |                    | L122            | 12.3               | L122                             |                    | L122                             |                    | <b>β2</b>     |
|                                          | T123        | 35.0               | T123          |                    |                  |                    | T123            |                    | T123                             |                    | T123                             |                    |               |
|                                          | P124        |                    | G124          | 30.2               |                  |                    | G124            | 33.7               | P124                             |                    | P124                             |                    |               |
|                                          | L125        | 91.5               |               |                    |                  |                    |                 |                    | L125                             |                    | L125                             |                    |               |
| <b>β3</b>                                | N197        |                    | N197          |                    |                  |                    | N197            |                    | N197                             | 15.5               | N197                             |                    | <b>β3</b>     |
|                                          | T198        |                    | G198          | 12.5               |                  |                    | G198            |                    | T198                             | 14.2               | T198                             |                    |               |
| <b>β9</b>                                | T257        |                    | T257          |                    | T60              |                    | T257            | 6.9                | T257                             |                    | T257                             |                    | <b>β9</b>     |
|                                          | V275        |                    | E275          |                    | V78              |                    | E275            | 7.9                | E275                             | 13.7               | E275                             |                    |               |
|                                          | N276        |                    | N276          | 28.9               | N79              | 78.7               | N276            | 9.3                | N276                             | 22.4               | N276                             |                    |               |
|                                          | T278        |                    | T278          | 79.5               | T81              | 66.0               | T278            | 44.9               | T278                             | 64.0               | T278                             |                    |               |
| <b>Loop D</b>                            | D279        | 26.5               | N279          | 62.4               | D82              | 62.3               | N279            | 57.7               | N279                             | 50.4               | N279                             |                    | <b>Loop D</b> |
|                                          | N280        | 52.5               | N280          | 71.3               | N83              | 64.0               | N280            | 65.7               | N280                             | 62.9               | N280                             |                    |               |
|                                          | A281        | 66.6               | A281          | 70.5               | A84              | 71.8               | A281            | 84.1               | A281                             | 81.2               | A281                             |                    |               |
|                                          | K282        |                    | K282          | 29.5               | K85              | 41.8               | K282            | 46.6               | K282                             | 65.4               | K282                             |                    |               |
|                                          | T283        | 21.0               | T283          | 13.4               | S86              |                    | T283            | 8.8                | N283                             | 19.5               | N283                             |                    |               |
|                                          | I360        |                    | I360          |                    | I134             |                    | I360            |                    | R360                             | 16.2               | R360                             |                    |               |
|                                          | S365        | 69.2               | S365          | 60.3               | S139             | 54.7               | S365            | 52.6               | S365                             | 65.0               | S365                             |                    |               |
| <b>β15</b>                               | G366        | 28.5               | G366          | 22.8               | G140             | 24.8               | G366            | 24.0               | G366                             | 24.7               | G366                             |                    | <b>β15</b>    |
|                                          | G367        | 34.2               | G367          | 24.2               | G141             | 20.6               | G367            | 25.4               | G367                             | 22.8               | G367                             |                    |               |
|                                          | D368        | 57.1               | D368          | 49.2               | D142             | 36.7               | D368            | 55.5               | D368                             | 44.6               | D368                             |                    |               |
| <b>α3</b>                                | E370        | 16.5               | E370          |                    | E144             | 6.8                | E370            | 18.1               | E370                             |                    | E370                             |                    | <b>α3</b>     |
|                                          | I371        | 43.9               | I371          | 48.0               | I145             | 32.6               | I371            | 39.7               | V371                             | 39.0               | V371                             |                    |               |
| <b>β20</b>                               | N425        | 19.2               | N425          |                    |                  |                    | N425            | 10.8               | N425                             |                    | N425                             |                    | <b>β20</b>    |
|                                          | M426        | 16.1               | M426          |                    |                  |                    | M426            | 4.0                | M426                             |                    | M426                             |                    |               |
|                                          | W427        | 29.2               | W427          | 5.5                |                  |                    | W427            | 40.3               | W427                             | 10.6               | W427                             |                    |               |
|                                          | Q428        | 1.0                | Q428          |                    |                  |                    | Q428            |                    | Q428                             | 87.3               | Q428                             |                    |               |
|                                          | K429        | 9.5                | K429          | 2.1                |                  |                    | G429            | 25.7               | R429                             |                    | R429                             |                    |               |
| <b>β21</b>                               | V430        | 119.1              | T430          | 57.0               |                  |                    | T430            | 50.6               | I430                             | 37.7               | I430                             |                    | <b>β21</b>    |
|                                          | G431        |                    | G431          |                    |                  |                    | G431            | 11.3               | G431                             |                    | G431                             |                    |               |
|                                          | K432        |                    | Q432          |                    |                  |                    | Q432            | 11.2               | Q432                             |                    | Q432                             |                    |               |
| <b>β23</b>                               | T455        | 17.7               | T455          | 32.7               | T25              | 23.3               | T455            | 32.0               | T455                             | 27.7               | T455                             |                    | <b>β23</b>    |
|                                          | R456        | 4.2                | R456          | 5.6                | R26              | 10.7               | R456            | 8.4                | R456                             | 13.1               | R456                             |                    |               |
|                                          | D457        | 21.5               | D457          | 43.8               | D27              | 46.8               | D457            | 37.2               | D457                             | 53.8               | D457                             |                    |               |
|                                          | G458        | 20.4               | G458          | 52.2               | G28              | 52.1               | G458            | 42.0               | G458                             | 42.8               | G458                             |                    |               |
|                                          | G459        | 47.8               | G459          | 70.3               | G29              | 66.0               | G459            | 69.1               | G459                             | 68.9               | G459                             |                    |               |
| <b>V5</b>                                | N460        |                    | A460          | 53.0               | N30              | 99.4               | A460            | 24.4               | S460                             | 21.1               | S460                             |                    | <b>V5</b>     |
|                                          | S461        |                    | N461          | 69.1               | S31              |                    | N461            | 37.2               | T461                             | 98.3               | T461                             |                    |               |
|                                          | N462        |                    | N462          |                    | N32              |                    | N462            |                    | N462                             |                    | N462                             |                    |               |
|                                          | N463        |                    | T463          | 15.9               | A33              | 6.1                | T463            | 17.1               | S463                             | 12.4               | S463                             |                    |               |
|                                          | S465        |                    | N465          | 7.6                | S35              | 21.5               | N465            | 6.3                | T465                             | 15.0               | T465                             |                    |               |
| <b>β24</b>                               | E466        |                    | E466          | 13.1               | E36              | 4.7                | E466            |                    | E466                             |                    | E466                             |                    | <b>β24</b>    |
|                                          | I467        |                    | T467          | 9.0                | I37              | 23.7               | T467            | 18.6               | T467                             | 14.9               | T467                             |                    |               |
|                                          | R469        | 15.0               | R469          | 24.3               | R39              | 18.1               | R469            | 25.6               | R469                             | 24.3               | R469                             |                    |               |
|                                          | G471        |                    | G471          |                    | G41              |                    | G471            |                    | G471                             |                    | G471                             |                    |               |
|                                          | G472        | 19.4               | G472          |                    | G42              | 13.1               | G472            |                    | G472                             | 12.2               | G472                             |                    |               |
|                                          | G473        | 26.7               | G473          | 46.8               | G43              | 27.8               | G473            | 35.7               | G473                             | 19.8               | G473                             |                    |               |
|                                          | D474        | 50.6               | N474          | 23.6               | D44              | 62.9               | N474            | 24.0               | D474                             | 28.9               | D474                             |                    |               |
|                                          | M475        |                    | I475          |                    | M45              | 71.3               | I475            |                    | M475                             |                    | M475                             |                    |               |
| <b>α5</b>                                | R476        | 7.0                | K476          | 4.8                | R46              | 87.2               | K476            | 23.0               | R476                             | 39.0               | R476                             |                    | <b>α5</b>     |
|                                          | D477        |                    | D477          |                    | D47              | 5.4                | D477            |                    | D477                             |                    | D477                             |                    |               |
|                                          | R480        |                    | R480          |                    | I48              | 8.7                | R480            | 12.7               | R480                             | 15.6               | R480                             |                    |               |
| <b>Total protein BSA (Å<sup>2</sup>)</b> | 978.7       |                    | 1166.1        |                    | 1214.9           |                    | 1274.4          |                    | 1388.1                           |                    | 61.7                             |                    |               |
| <b>Glycan</b>                            | 197         |                    | 197           |                    | 197              |                    | 197             |                    | 197                              | 126.0              | 197                              |                    |               |
|                                          | 234         |                    | 234           |                    | 234              |                    | 234             |                    | 234                              | 284.2              | 234                              |                    |               |
|                                          | 262         |                    | 262           |                    | 262              |                    | 262             |                    | 262                              |                    | 262                              | 21.8               |               |
|                                          | 276         | 33.1               | 276           | 108.2              | 276              | 503.2              | 276             | 386.9              | 276                              | 64.2               | 276                              |                    |               |
|                                          | 462         |                    | 462           |                    | 462              |                    | 462             |                    | 462                              | 135.1              | 462                              |                    |               |
| <b>Total glycan BSA (Å<sup>2</sup>)</b>  | 33.1        |                    | 108.2         |                    | 503.2            |                    | 386.9           |                    | 609.5                            |                    | 21.8                             |                    |               |
| <b>Total BSA monomer (Å<sup>2</sup>)</b> | 1011.8      |                    | 1274.3        |                    | 1718.1           |                    | 1661.3          |                    | 1997.6                           |                    | 83.5                             |                    |               |
| <b>Total BSA trimer (Å<sup>2</sup>)</b>  | 2081.1      |                    |               |                    |                  |                    |                 |                    |                                  |                    |                                  |                    |               |
