# Supplementary material for: Minimally Mutated HIV-1 Broadly Neutralizing Antibodies to Guide Reductionist Vaccine Design
Source: PubMed Central journal article supplement (PMC4999182; doi:10.1371/journal.ppat.1005815), 2016-08-25
Supplement: ppat.1005815.s015.pdf [file ppat.1005815.s015.pdf]

**Table S5. Light chain of VRC01-class antibodies undergoes somatic hypermutation to accommodate the N276 glycan on Env.** The glycan site at N276 was removed by alanine mutagenesis (N276A) on a cross-clade 13-virus panel and tested for neutralization compared to the corresponding virus without the glycan site removed (wild-type, WT). Virus panels were tested for neutralization by chimeric VRC01-class antibodies containing a mature heavy chain and germline light chain. Presented values are neutralization IC<sub>50</sub> in µg/ml and colored according to the listed legend.

|         |         | Mature heavy chain/germline light chain chimeras |          |       |          |       |        |       |       |       |       | Neutralization IC <sub>50</sub> (µg/mL) |       |
|---------|---------|--------------------------------------------------|----------|-------|----------|-------|--------|-------|-------|-------|-------|-----------------------------------------|-------|
| CLADE   | VIRUS   | VRC03                                            | CHA31    | PGV04 | NIH45-46 | PGV19 | 3BNC60 | 12A12 | 12A21 | VRC01 | PGV20 |                                         |       |
| WT      | A       | Q769.d22                                         | 0.077    | > 50  | > 50     | 0.032 | 0.185  | 0.575 | 1.09  | 0.08  | 0.234 | 0.019                                   | 50    |
|         | A       | 191084 B7-19                                     | > 50     | > 50  | > 50     | 0.053 | > 50   | > 50  | > 50  | > 50  | 0.147 | 0.033                                   | 10    |
|         | B       | SC422661.8                                       | > 50     | > 50  | > 50     | 2.27  | > 50   | > 50  | > 50  | > 50  | 3.60  | 5.06                                    | 1     |
|         | B       | RHPA4259.7                                       | > 50     | > 50  | > 50     | > 50  | > 50   | > 50  | > 50  | > 50  | > 50  | > 50                                    | 0.10  |
|         | B (T/F) | 1012_11_TC21_3257                                | 0.030    | > 50  | > 50     | 0.008 | > 50   | > 50  | > 50  | > 50  | 0.175 | 0.041                                   | 0.01  |
|         | B (T/F) | 6244_13_B5_4576                                  | > 50     | > 50  | > 50     | 1.27  | > 50   | > 50  | > 50  | > 50  | > 50  | > 50                                    | 0.001 |
|         | C       | ZM249M.PL1                                       | > 50     | > 50  | > 50     | > 50  | > 50   | > 50  | > 50  | > 50  | > 50  | 3.97                                    |       |
|         | C       | ZM109F.PB4                                       | > 50     | > 50  | > 50     | > 50  | > 50   | > 50  | > 50  | > 50  | > 50  | > 50                                    |       |
|         | C       | 249M B10                                         | > 50     | > 50  | > 50     | > 50  | > 50   | > 50  | 1.56  | > 50  | 3.81  | 0.114                                   |       |
|         | G       | X1632_S2_B10                                     | > 50     | > 50  | > 50     | > 50  | > 50   | > 50  | > 50  | > 50  | > 50  | > 50                                    |       |
|         | AC      | 3301.v1.c24                                      | > 50     | > 50  | > 50     | 0.123 | > 50   | > 50  | > 50  | > 50  | > 50  | 0.870                                   |       |
|         | CD      | 6952.v1.c20                                      | > 50     | > 50  | > 50     | 4.52  | > 50   | > 50  | > 50  | > 50  | 3.29  | > 50                                    |       |
|         | ACD     | 0815.v3.c3                                       | > 50     | > 50  | > 50     | > 50  | > 50   | 2.26  | > 50  | > 50  | > 50  | 0.286                                   |       |
|         | N276A   | A                                                | Q769.d22 | 0.008 | 0.291    | > 50  | 0.003  | 0.010 | 0.015 | 0.057 | 0.003 | 0.008                                   | 0.002 |
| A       |         | 191084 B7-19                                     | 0.006    | 0.010 | 0.011    | 0.002 | 0.009  | 0.034 | 0.089 | 1.376 | 0.011 | 0.004                                   |       |
| B       |         | SC422661.8                                       | 0.003    | 0.033 | 0.010    | 0.003 | 0.118  | 0.043 | 3.095 | > 50  | 0.017 | 0.007                                   |       |
| B       |         | RHPA4259.7                                       | 0.023    | 0.269 | 0.272    | 0.002 | > 50   | 0.015 | > 50  | > 50  | 0.010 | 0.109                                   |       |
| B (T/F) |         | 1012_11_TC21_3257                                | 0.005    | 0.134 | 0.012    | 0.001 | 0.020  | 0.023 | 0.786 | 0.269 | 0.015 | 0.007                                   |       |
| B (T/F) |         | 6244_13_B5_4576                                  | 0.101    | 1.016 | > 50     | 0.009 | 1.504  | 0.059 | 0.332 | 0.098 | 0.044 | 0.012                                   |       |
| C       |         | ZM249M.PL1                                       | 0.178    | 0.033 | 0.090    | 0.006 | 0.196  | 0.266 | 0.057 | 1.230 | 0.008 | 0.002                                   |       |
| C       |         | ZM109F.PB4                                       | > 50     | > 50  | 0.088    | 0.028 | > 50   | > 50  | > 50  | > 50  | 0.286 | 0.005                                   |       |
| C       |         | 249M B10                                         | 0.148    | 0.020 | 0.055    | 0.006 | 0.159  | 0.187 | 0.050 | 1.010 | 0.010 | 0.001                                   |       |
| G       |         | X1632_S2_B10                                     | 0.059    | 0.008 | 0.005    | 0.003 | > 50   | 0.029 | > 50  | > 50  | 0.035 | 0.003                                   |       |
| AC      |         | 3301.v1.c24                                      | 0.089    | 0.627 | 0.176    | 0.004 | 1.855  | 0.218 | 0.265 | > 50  | 0.033 | 0.004                                   |       |
| CD      |         | 6952.v1.c20                                      | 0.008    | > 50  | > 50     | 0.004 | 1.766  | > 50  | > 50  | > 50  | 0.004 | 0.004                                   |       |
| ACD     |         | 0815.v3.c3                                       | 0.001    | 0.001 | > 50     | 0.001 | 0.002  | 0.002 | 0.017 | 0.054 | 0.007 | 0.001                                   |       |
