# Supplementary material for: Minimally Mutated HIV-1 Broadly Neutralizing Antibodies to Guide Reductionist Vaccine Design
Source: PubMed Central journal article supplement (PMC4999182; doi:10.1371/journal.ppat.1005815), 2016-08-25
Supplement: ppat.1005815.s016.pdf [file ppat.1005815.s016.pdf]

**Table S6. Removal of the N276 glycan site affects predominantly VRC01-class antibodies.**

The glycan site at N276 was removed by alanine mutagenesis on a cross-clade 6-virus panel and tested for neutralization by VRC01 class antibodies as well as CD4 IgG<sub>2</sub>, other CD4bs bnAbs (b12), and CD4bs non-broadly neutralizing antibodies (b6, F105). Presented values are neutralization IC<sub>50</sub> in µg/ml and colored according to the listed legend.

|               | WT     |         |          |         |         |       | Neutralization<br>IC <sub>50</sub> (µg/mL) |
|---------------|--------|---------|----------|---------|---------|-------|--------------------------------------------|
|               | JR-CSF | 92TH021 | IAVI C22 | 94UG103 | 92RW020 | JR-FL |                                            |
| VRC01         | 0.225  | 0.370   | 0.651    | 0.164   | 0.205   | 0.021 | 50                                         |
| MinVRC01      | 0.080  | 0.539   | 0.899    | 0.483   | 0.151   | 0.367 | 10                                         |
| MinVRC01 ΔFW3 | > 50   | > 50    | > 50     | > 50    | > 50    | > 50  | 1                                          |
| MinVRC01 GL-L | > 50   | > 50    | > 50     | > 50    | > 50    | > 50  | 0.10                                       |
| b6            | > 50   | > 50    | > 50     | > 50    | > 50    | > 50  | 0.01                                       |
| F105          | > 50   | > 50    | > 50     | > 50    | > 50    | > 50  | 0.001                                      |
| CD4 IgG2      | 1.11   | 0.325   | 5.16     | 0.044   | 0.434   | 0.045 |                                            |
| b12           | 0.590  | 1.14    | 8.55     | 2.02    | > 50    | 0.019 |                                            |

  

|               | N276A  |         |          |         |         |       |
|---------------|--------|---------|----------|---------|---------|-------|
|               | JR-CSF | 92TH021 | IAVI C22 | 94UG103 | 92RW020 | JR-FL |
| VRC01         | 0.063  | 0.149   | 0.069    | 0.026   | 0.040   | 0.026 |
| MinVRC01      | 0.017  | 0.048   | 0.051    | 0.117   | 0.033   | 0.004 |
| MinVRC01 ΔFW3 | 0.053  | 0.038   | 0.097    | 0.149   | 0.055   | 0.006 |
| MinVRC01 GL-L | 0.057  | 0.292   | 0.163    | 0.215   | 0.073   | 0.009 |
| b6            | > 50   | > 50    | > 50     | > 50    | > 50    | > 50  |
| F105          | > 50   | > 50    | > 50     | > 50    | > 50    | > 50  |
| CD4 IgG2      | 5.20   | 0.675   | 19.3     | 0.166   | 0.815   | 0.050 |
| b12           | 0.738  | 3.75    | 11.3     | 8.00    | > 50    | 0.016 |
