# Supplementary material for: Minimally Mutated HIV-1 Broadly Neutralizing Antibodies to Guide Reductionist Vaccine Design
Source: PubMed Central journal article supplement (PMC4999182; doi:10.1371/journal.ppat.1005815), 2016-08-25
Supplement: ppat.1005815.s017.pdf [file ppat.1005815.s017.pdf]

**Table S7. X-ray data collection and refinement statistics**

|                                           | eOD-N276Kif + VRC01              | BG505 SOSIP + PGT122 + NIH45-46 |
|-------------------------------------------|----------------------------------|---------------------------------|
| Beamline                                  | APS 23-ID-B                      | APS 23-ID-D                     |
| # crystals                                | 1                                | 3                               |
| Wavelength, Å                             | 1.03324                          | 1.03324                         |
| Space group                               | P4 <sub>1</sub> 2 <sub>1</sub> 2 | C2                              |
| Unit cell a, b, c (Å)                     | 113.5, 113.5, 412.5              | 153.7, 254.2, 283.4             |
| $\alpha, \beta, \gamma$ (°)               | 90, 90, 90                       | 90, 101.0, 90                   |
| Resolution (Å)                            | 40.0 – 3.25 (3.35 – 3.25)        | 40.0 – 4.4 (4.5 – 4.4)          |
| Completeness                              | 99.9 (100.0)                     | 99.9 (100.0)                    |
| Redundancy                                | 8.0 (8.2)                        | 21.4 (21.3)                     |
| No. total reflections                     | 351,738                          | 1,451,956                       |
| No. unique reflections                    | 43,730                           | 67,706                          |
| I/ $\sigma$                               | 10.9 (2.2)                       | 5.9 (2.0)                       |
| CC <sub>1/2</sub>                         | 99.5 (57.2)                      | 98.7 (13.5)                     |
| R <sub>sym</sub>                          | 0.16 (0.85)                      | 0.39 (1.03)                     |
| R <sub>pim</sub>                          | 0.06 (0.32)                      | 0.09 (0.23)                     |
| Refinement Statistics                     |                                  |                                 |
| Resolution (Å)                            | 40 - 3.25                        | 40 - 4.4                        |
| No. reflections total/R <sub>free</sub>   | 43,600/2,180                     | 67,696/1,021                    |
| R <sub>cryst</sub> /R <sub>free</sub>     | 0.22/0.27                        | 0.29/0.32                       |
| RMSD bond length (Å)                      | 0.004                            | 0.004                           |
| RMSD bond angles (°)                      | 0.8                              | 0.8                             |
| Protein atoms/Glycan atoms                | 13,500/349                       | 28,692/2,682                    |
| Wilson B-value (Å <sup>2</sup> )          | 100                              | 145                             |
| Overall average B-value (Å <sup>2</sup> ) | 120                              | 218                             |
| Ramachandran allowed %                    | 99.4                             | 99.2                            |
| MolProbity all-atom clashscore            | 9.2                              | 8.1                             |
| PDB ID                                    | 5KZC                             | 5D9Q                            |
